# Supplementary material
Source: PubMed Central journal article supplement (PMC9280613)
Supplement: jamasurg-e222761-s001.pdf [file jamasurg-e222761-s001.pdf]

## Supplemental Online Content

Reitz KM, Kennedy J, Li SR, et al. Association between time to source control in sepsis and 90-day mortality. *JAMA Surg*. Published online July 13, 2022.  
doi:10.1001/jamasurg.2022.2761

- eMethods.** Fractional polynomial model assessment
- eTable 1.** Hospital specific American College of Surgeons surgeon availability mandate
- eTable 2.** Source control procedures, anatomic category, and procedural stress
- eTable 3.** Most common source control intervention families
- eTable 4.** Feature summary statistics before and after imputation
- eTable 5.** Cohort characteristics by anatomic location of source control
- eTable 6.** Logistic regression - primary model with all-cause 90-day mortality as outcome
- eTable 7.** Logistic regression - primary model with all-cause in-hospital mortality as outcome
- eTable 8.** Logistic regression - primary model with all-cause 365-day mortality as outcome
- eTable 9.** Cohort characteristics by most common intervention
- eTable 10.** Adjusted absolute risk difference of 90-day mortality when compared to source control at six hours, by most common interventions
- eTable 11.** Sensitivity analyses - modifications to covariate set
- eFigure 1.** Cohort accrual
- eFigure 2.** Correlation between variables and time to source control
- eFigure 3.** Observed and adjusted risk of 90-day mortality by source control anatomic categories
- eFigure 4.** Association between early source control and 90-day mortality among the most common interventions

This supplemental material has been provided by the authors to give readers additional information about their work.

## **eMethods. Fractional Polynomial Model Assessment**

The primary multivariable logistic regression model clustered at the level of the hospital was compared to the best fitting multivariable fractional polynomial model expressing the primary exposure in multiple dimensions (1 to 3) and fit terms (-3 to +3 degrees). Resulting fractional polynomial models did not yield a statistically significant improvement to model fit (1-dimension,  $P=0.22$ ; 2-dimensions,  $P=0.62$ ; 3-dimensions,  $P=0.74$ ). Thus, a linear fit was retained for the primary exposure in our primary model.

**eTable 1. Hospital specific American College of Surgeons surgeon availability mandate**

| Hospital | Trauma Center Level | Mandated Specialist Availability <sup>c</sup> | Bed Number | Rurality | Teaching status |
|----------|---------------------|-----------------------------------------------|------------|----------|-----------------|
| 1        | I <sup>a</sup>      | 24-hour in-house                              | 1601       | Urban    | Teaching        |
| 2        | Not leveled         | Not mandated                                  | 520        | Urban    | Teaching        |
| 3        | Not leveled         | Not mandated                                  | 435        | Urban    | Nonteaching     |
| 4        | II <sup>b</sup>     | 24-hour available                             | 423        | Urban    | Teaching        |
| 5        | I <sup>a</sup>      | 24-hour in-house                              | 404        | Urban    | Teaching        |
| 6        | Not leveled         | Not mandated                                  | 383        | Urban    | Teaching        |
| 7        | II <sup>b</sup>     | 24-hour available                             | 380        | Urban    | Teaching        |
| 8        | Not leveled         | Not mandated                                  | 312        | Urban    | Nonteaching     |
| 9        | Not leveled         | Not mandated                                  | 272        | Urban    | Teaching        |
| 10       | Not leveled         | Not mandated                                  | 249        | Urban    | Teaching        |
| 11       | Not leveled         | Not mandated                                  | 246        | Urban    | Nonteaching     |
| 12       | Not leveled         | Not mandated                                  | 165        | Urban    | Nonteaching     |
| 13       | Not leveled         | Not mandated                                  | 122        | Rural    | Teaching        |
| 14       | Not leveled         | Not mandated                                  | 49         | Rural    | Nonteaching     |

<sup>a</sup>Level 1 trauma centers are tertiary care facilities central to the regional trauma system capable of providing comprehensive resources and acting as a referral resource for the nearby region. Required elements include but are not limited to 24-hour in-house coverage by general surgeons and prompt availability of orthopedic, cranial, plastic, oral and maxillofacial surgeons as well as anesthesiology, emergency medicine, radiology, and critical care.

<sup>b</sup>Level 2 trauma centers required elements include 24-hour immediate coverage by general surgeons as well as coverage by orthopedic and cranial surgeons as well as anesthesiology, emergency medicine, radiology, and critical care

<sup>c</sup>American College of Surgeons trauma center verification

**eTable 2. Source control procedures, anatomic category, and procedural stress**

| CPT code <sup>a</sup>                 | Procedure Stress <sup>b</sup> | Frequency of Code | Procedure Description                                                                                                                                                      |
|---------------------------------------|-------------------------------|-------------------|----------------------------------------------------------------------------------------------------------------------------------------------------------------------------|
| <i>Gastrointestinal and abdominal</i> |                               |                   |                                                                                                                                                                            |
| 49406                                 | Low                           | 363               | Image-guided fluid collection drainage by catheter (eg, abscess, hematoma, seroma, lymphocele, cyst); peritoneal or retroperitoneal, percutaneous                          |
| 44120                                 | High                          | 94                | Enterectomy, resection of small intestine; single resection and anastomosis                                                                                                |
| 44970                                 | High                          | 88                | Laparoscopy, surgical, appendectomy                                                                                                                                        |
| 49000                                 | High                          | 77                | Exploratory laparotomy, exploratory celiotomy with or without biopsy(s)                                                                                                    |
| 49002                                 | High                          | 68                | Reopening of recent laparotomy                                                                                                                                             |
| 44140                                 | High                          | 56                | Colectomy, partial; with anastomosis                                                                                                                                       |
| 44143                                 | High                          | 51                | Colectomy, partial; with end colostomy and closure of distal segment (Hartmann type procedure)                                                                             |
| 46040                                 | Low                           | 43                | Incision and drainage of ischiorectal and/or perirectal abscess                                                                                                            |
| 44160                                 | High                          | 33                | Colectomy, partial, with removal of terminal ileum with ileocolostomy                                                                                                      |
| 43840                                 | High                          | 31                | Gastrorrhaphy, suture of perforated duodenal or gastric ulcer, wound, or injury                                                                                            |
| 49405                                 | Low                           | 31                | Image-guided fluid collection drainage by catheter (eg, abscess, hematoma, seroma, lymphocele, cyst); visceral (eg, kidney, liver, spleen, lung/mediastinum), percutaneous |
| 44141                                 | High                          | 27                | Colectomy, partial; with skin level cecostomy or colostomy                                                                                                                 |
| 44950                                 | High                          | 23                | Appendectomy                                                                                                                                                               |
| 49561                                 | High                          | 21                | Repair initial incisional or ventral hernia; incarcerated or strangulated                                                                                                  |
| 49020                                 | High                          | 18                | Drainage of peritoneal abscess or localized peritonitis, exclusive of appendiceal abscess, open                                                                            |
| 49422                                 | Low                           | 17                | Removal of tunneled intraperitoneal catheter                                                                                                                               |
| 44180                                 | High                          | 16                | Laparoscopy, surgical, enterolysis (freeing of intestinal adhesion)                                                                                                        |
| 44150                                 | High                          | 15                | Colectomy, total, abdominal, without proctectomy; with ileostomy or ileoproctostomy                                                                                        |
| 44130                                 | High                          | 14                | Enteroenterostomy, anastomosis of intestine, with or without cutaneous enterostomy                                                                                         |
| 44145                                 | High                          | 13                | Colectomy, partial; with coloproctostomy (low pelvic anastomosis)                                                                                                          |
| 44310                                 | High                          | 13                | Ileostomy or jejunostomy, non-tube                                                                                                                                         |
| 44320                                 | High                          | 13                | Colostomy or skin level cecostomy                                                                                                                                          |
| 49423                                 | Low                           | 13                | Exchange of previously placed abscess or cyst drainage catheter under radiological guidance                                                                                |
| 44602                                 | High                          | 12                | Suture of small intestine (enterorrhaphy) for perforated ulcer, diverticulum, wound, injury or rupture; single perforation                                                 |
| 44050                                 | High                          | 11                | Reduction of volvulus, intussusception, internal hernia, by laparotomy                                                                                                     |
| 44125                                 | High                          | 11                | Enterectomy, resection of small intestine; with enterostomy                                                                                                                |
| 44187                                 | High                          | 10                | Laparoscopy, surgical; ileostomy or jejunostomy, non-tube                                                                                                                  |
| 49084                                 | High                          | 10                | Peritoneal lavage, including imaging guidance, when performed                                                                                                              |
| 44144                                 | High                          | 9                 | Colectomy, partial; with resection, with colostomy or ileostomy and creation of mucofistula                                                                                |
| 49507                                 | High                          | 9                 | Repair initial inguinal hernia, age 5 years or older; incarcerated or strangulated                                                                                         |

|       |      |   |                                                                                                                                                               |
|-------|------|---|---------------------------------------------------------------------------------------------------------------------------------------------------------------|
| 44955 | High | 7 | Appendectomy; when done for indicated purpose at time of other major procedure (not as separate procedure)                                                    |
| 45990 | Low  | 7 | Anorectal exam, surgical, requiring anesthesia (general, spinal, or epidural), diagnostic                                                                     |
| 49587 | High | 7 | Repair umbilical hernia, age 5 years or older; incarcerated or strangulated                                                                                   |
| 44202 | High | 6 | Laparoscopy, surgical; enterectomy, resection of small intestine, single resection and anastomosis                                                            |
| 49060 | High | 6 | Drainage of retroperitoneal abscess, open                                                                                                                     |
| 43631 | High | 5 | Gastrectomy, partial, distal; with gastroduodenostomy                                                                                                         |
| 43659 | High | 5 | Unlisted laparoscopy procedure, stomach                                                                                                                       |
| 46060 | Low  | 5 | Incision and drainage of ischiorectal or intramural abscess, with fistulectomy or fistulotomy, submuscular, with or without placement of seton                |
| 38100 | High | 4 | Splenectomy; total                                                                                                                                            |
| 44155 | High | 4 | Colectomy, total, abdominal, with proctectomy; with ileostomy                                                                                                 |
| 44188 | High | 4 | Laparoscopy, surgical, colostomy or skin level cecostomy                                                                                                      |
| 49566 | High | 4 | Repair recurrent incisional or ventral hernia; incarcerated or strangulated                                                                                   |
| 43610 | High | 3 | Excision, local; ulcer or benign tumor of stomach                                                                                                             |
| 43632 | High | 3 | Gastrectomy, partial, distal; with gastrojejunostomy                                                                                                          |
| 43825 | High | 3 | Gastrojejunostomy; with vagotomy, any type                                                                                                                    |
| 44020 | High | 3 | Enterotomy, small intestine, other than duodenum; for exploration, biopsy(s), or foreign body removal                                                         |
| 44121 | High | 3 | Enterectomy, resection of small intestine; each additional resection and anastomosis                                                                          |
| 44205 | High | 3 | Laparoscopy, surgical; colectomy, partial, with removal of terminal ileum with ileocolostomy                                                                  |
| 44346 | High | 3 | Revision of colostomy; with repair of paracolostomy hernia                                                                                                    |
| 44625 | High | 3 | Closure of enterostomy, large or small intestine; with resection and anastomosis other than colorectal                                                        |
| 45020 | High | 3 | Incision and drainage of deep supralevator, pelvirectal, or retrorectal abscess                                                                               |
| 49325 | High | 3 | Laparoscopy, surgical; with revision of previously placed intraperitoneal cannula or catheter, with removal of intraluminal obstructive material if performed |
| 43633 | High | 2 | Gastrectomy, partial, distal; with Roux-en-Y reconstruction                                                                                                   |
| 43820 | High | 2 | Gastrojejunostomy; without vagotomy                                                                                                                           |
| 43848 | High | 2 | Revision, open, of gastric restrictive procedure for morbid obesity, other than adjustable gastric restrictive device                                         |
| 44345 | High | 2 | Revision of colostomy; complicated (reconstruction in-depth)                                                                                                  |
| 44603 | High | 2 | Suture of small intestine (enterorrhaphy) for perforated ulcer, diverticulum, wound, injury or rupture; multiple perforations                                 |
| 44604 | High | 2 | Suture of large intestine (colorrhaphy) for perforated ulcer, diverticulum, wound, injury or rupture (single or multiple perforations); without colostomy     |
| 45000 | High | 2 | Transrectal drainage of pelvic abscess                                                                                                                        |

|       |      |   |                                                                                                                                                                                                              |
|-------|------|---|--------------------------------------------------------------------------------------------------------------------------------------------------------------------------------------------------------------|
| 45111 | High | 2 | Proctectomy; partial resection of rectum, transabdominal approach                                                                                                                                            |
| 45393 | Low  | 2 | Colonoscopy, flexible; with decompression (for pathologic distention) (eg, volvulus, megacolon), including placement of decompression tube, when performed                                                   |
| 45915 | Low  | 2 | Removal of fecal impaction or foreign body under anesthesia                                                                                                                                                  |
| 46045 | Low  | 2 | Incision and drainage of intramural, intramuscular, or submucosal abscess, transanal, under anesthesia                                                                                                       |
| 49205 | High | 2 | Excision or destruction, open, intra-abdominal tumors, cysts or endometriomas, 1 or more peritoneal, mesenteric, or retroperitoneal primary or secondary tumors; largest tumor greater than 10.0 cm diameter |
| 49429 | High | 2 | Removal of peritoneal-venous shunt                                                                                                                                                                           |
| 49521 | High | 2 | Repair recurrent inguinal hernia, any age; incarcerated or strangulated                                                                                                                                      |
| 49553 | High | 2 | Repair initial femoral hernia, any age; incarcerated or strangulated                                                                                                                                         |
| 49999 | High | 2 | Unlisted procedure, abdomen, peritoneum and omentum                                                                                                                                                          |
| 43635 | High | 1 | Vagotomy when performed with partial distal gastrectomy (List separately in addition to code[s] for primary procedure)                                                                                       |
| 43640 | High | 1 | Vagotomy including pyloroplasty, with or without gastrostomy; truncal or selective                                                                                                                           |
| 43860 | High | 1 | Revision of gastrojejunal anastomosis (gastrojejunostomy) with reconstruction, with or without partial gastrectomy or intestine resection; without vagotomy                                                  |
| 43870 | High | 1 | Closure of gastrostomy, surgical                                                                                                                                                                             |
| 44021 | High | 1 | Enterotomy, small intestine, other than duodenum; for decompression (eg, Baker tube)                                                                                                                         |
| 44025 | High | 1 | Colotomy, for exploration, biopsy(s), or foreign body removal                                                                                                                                                |
| 44110 | High | 1 | Excision of 1 or more lesions of small or large intestine not requiring anastomosis, exteriorization, or fistulization; single enterotomy                                                                    |
| 44146 | High | 1 | Colectomy, partial; with coloproctostomy (low pelvic anastomosis), with colostomy                                                                                                                            |
| 44151 | High | 1 | Colectomy, total, abdominal, without proctectomy; with continent ileostomy                                                                                                                                   |
| 44207 | High | 1 | Laparoscopy, surgical; colectomy, partial, with anastomosis, with coloproctostomy (low pelvic anastomosis)                                                                                                   |
| 44210 | High | 1 | Laparoscopy, surgical; colectomy, total, abdominal, without proctectomy, with ileostomy or ileoproctostomy                                                                                                   |
| 44212 | High | 1 | Laparoscopy, surgical; colectomy, total, abdominal, with proctectomy, with ileostomy                                                                                                                         |
| 44227 | High | 1 | Laparoscopy, surgical, closure of enterostomy, large or small intestine, with resection and anastomosis                                                                                                      |
| 44314 | High | 1 | Revision of ileostomy; complicated (reconstruction in-depth)                                                                                                                                                 |
| 44605 | High | 1 | Suture of large intestine (colorrhaphy) for perforated ulcer, diverticulum, wound, injury or rupture (single or multiple perforations); with colostomy                                                       |
| 44620 | High | 1 | Closure of enterostomy, large or small intestine                                                                                                                                                             |
| 44640 | High | 1 | Closure of intestinal cutaneous fistula                                                                                                                                                                      |

|                                 |      |     |                                                                                                                                                                                                         |
|---------------------------------|------|-----|---------------------------------------------------------------------------------------------------------------------------------------------------------------------------------------------------------|
| 44701                           | High | 1   | Intraoperative colonic lavage                                                                                                                                                                           |
| 44800                           | High | 1   | Excision of Meckel's diverticulum (diverticulectomy) or omphalomesenteric duct                                                                                                                          |
| 44900                           | High | 1   | Incision and drainage of appendiceal abscess, open                                                                                                                                                      |
| 44960                           | High | 1   | Appendectomy; for ruptured appendix with abscess or generalized peritonitis                                                                                                                             |
| 45005                           | High | 1   | Incision and drainage of submucosal abscess, rectum                                                                                                                                                     |
| 45110                           | High | 1   | Proctectomy; complete, combined abdominoperineal, with colostomy                                                                                                                                        |
| 45337                           | Low  | 1   | Sigmoidoscopy, flexible; with decompression (for pathologic distention) (eg, volvulus, megacolon), including placement of decompression tube, when performed                                            |
| 45347                           | Low  | 1   | Sigmoidoscopy, flexible; with placement of endoscopic stent (includes pre- and post-dilation and guide wire passage, when performed)                                                                    |
| 45389                           | Low  | 1   | Colonoscopy, flexible; with endoscopic stent placement (includes pre- and post-dilation and guide wire passage, when performed)                                                                         |
| 45562                           | Low  | 1   | Exploration, repair, and presacral drainage for rectal injury                                                                                                                                           |
| 49010                           | High | 1   | Exploration, retroperitoneal area with or without biopsy(s)                                                                                                                                             |
| 49040                           | High | 1   | Drainage of subdiaphragmatic or subphrenic abscess, open                                                                                                                                                |
| 49250                           | High | 1   | Umbilectomy, omphalectomy, excision of umbilicus                                                                                                                                                        |
| 49402                           | High | 1   | Removal of peritoneal foreign body from peritoneal cavity                                                                                                                                               |
| 49557                           | High | 1   | Repair recurrent femoral hernia; incarcerated or strangulated                                                                                                                                           |
| 49572                           | High | 1   | Repair epigastric hernia (eg, preperitoneal fat); incarcerated or strangulated                                                                                                                          |
| 49653                           | High | 1   | Laparoscopy, surgical, repair, ventral, umbilical, spigelian or epigastric hernia (includes mesh insertion, when performed); incarcerated or strangulated                                               |
| 49655                           | High | 1   | Laparoscopy, surgical, repair, incisional hernia (includes mesh insertion, when performed); incarcerated or strangulated                                                                                |
| 49657                           | High | 1   | Laparoscopy, surgical, repair, recurrent incisional hernia (includes mesh insertion, when performed); incarcerated or strangulated                                                                      |
| <i>Hepatopancreaticobiliary</i> |      |     |                                                                                                                                                                                                         |
| 47562                           | High | 127 | Laparoscopy, surgical; cholecystectomy                                                                                                                                                                  |
| 43264                           | Low  | 126 | ERCP; with removal of calculi/debris from biliary/pancreatic duct(s)                                                                                                                                    |
| 43262                           | Low  | 122 | ERCP; with sphincterotomy/papillotomy                                                                                                                                                                   |
| 47490                           | Low  | 104 | Cholecystostomy, percutaneous, complete procedure, including imaging guidance, catheter placement, cholecystogram when performed, and radiological supervision and interpretation                       |
| 43274                           | Low  | 98  | ERCP; with placement of endoscopic stent into biliary or pancreatic duct, including pre- and post-dilation and guide wire passage, when performed, including sphincterotomy, when performed, each stent |
| 47563                           | High | 52  | Laparoscopy, surgical; cholecystectomy with cholangiography                                                                                                                                             |
| 43260                           | Low  | 41  | ERCP; diagnostic, including collection of specimen(s) by brushing or washing, when performed                                                                                                            |
| 47600                           | High | 34  | Cholecystectomy                                                                                                                                                                                         |

|                 |      |    |                                                                                                                                                                                                                                                                                                     |
|-----------------|------|----|-----------------------------------------------------------------------------------------------------------------------------------------------------------------------------------------------------------------------------------------------------------------------------------------------------|
| 43261           | Low  | 30 | ERCP; with biopsy, single or multiple                                                                                                                                                                                                                                                               |
| 43276           | Low  | 23 | ERCP; with removal and exchange of stent(s), biliary or pancreatic duct, including pre- and post-dilation and guide wire passage, when performed, including sphincterotomy, when performed, each stent exchanged                                                                                    |
| 47534           | Low  | 20 | Placement of biliary drainage catheter, percutaneous, including diagnostic cholangiography when performed, imaging guidance (eg, ultrasound and/or fluoroscopy), and all associated radiological supervision and interpretation; internal-external                                                  |
| 43266           | Low  | 19 | Esophagogastroduodenoscopy, flexible, transoral; with placement of endoscopic stent (includes pre- and post-dilation and guide wire passage, when performed)                                                                                                                                        |
| 47536           | Low  | 19 | Exchange of biliary drainage catheter (eg, external, internal-external, or conversion of internal-external to external only), percutaneous, including diagnostic cholangiography when performed, imaging guidance (eg, fluoroscopy), and all associated radiological supervision and interpretation |
| 43277           | Low  | 13 | ERCP; with trans-endoscopic balloon dilation of biliary/pancreatic duct(s) or of ampulla (sphincteroplasty), including sphincterotomy, when performed, each duct                                                                                                                                    |
| 43265           | Low  | 11 | ERCP; with destruction of calculi, any method (eg, mechanical, electrohydraulic, lithotripsy)                                                                                                                                                                                                       |
| 47605           | High | 10 | Cholecystectomy; with cholangiography                                                                                                                                                                                                                                                               |
| 43275           | Low  | 8  | ERCP; with removal of foreign body(s) or stent(s) from biliary/pancreatic duct(s)                                                                                                                                                                                                                   |
| 47120           | High | 5  | Hepatectomy, resection of liver; partial lobectomy                                                                                                                                                                                                                                                  |
| 47533           | Low  | 3  | Placement of biliary drainage catheter, percutaneous, including diagnostic cholangiography when performed, imaging guidance (eg, ultrasound and/or fluoroscopy), and all associated radiological supervision and interpretation; external                                                           |
| 47542           | Low  | 3  | Balloon dilation of biliary duct(s) or of ampulla (sphincteroplasty), percutaneous, including imaging guidance (eg, fluoroscopy), and all associated radiological supervision and interpretation, each duct                                                                                         |
| 47610           | High | 3  | Cholecystectomy with exploration of common duct                                                                                                                                                                                                                                                     |
| 48105           | High | 3  | Resection or debridement of pancreas and peripancreatic tissue for acute necrotizing pancreatitis                                                                                                                                                                                                   |
| 47400           | High | 2  | Hepaticotomy or hepaticostomy with exploration, drainage, or removal of calculus                                                                                                                                                                                                                    |
| 47579           | High | 2  | Unlisted laparoscopy procedure, biliary tract                                                                                                                                                                                                                                                       |
| 47480           | High | 1  | Cholecystotomy or cholecystostomy, open, with exploration, drainage, or removal of calculus                                                                                                                                                                                                         |
| 47535           | Low  | 1  | Conversion of external biliary drainage catheter to internal-external biliary drainage catheter, percutaneous, including diagnostic cholangiography when performed, imaging guidance (eg, fluoroscopy), and all associated radiological supervision and interpretation                              |
| 47544           | Low  | 1  | Removal of calculi/debris from biliary duct(s) and/or gallbladder, percutaneous, including destruction of calculi by any method (eg, mechanical, electrohydraulic, lithotripsy) when performed, imaging guidance (eg, fluoroscopy), and all associated radiological supervision and interpretation  |
| 47564           | High | 1  | Laparoscopy, surgical; cholecystectomy with exploration of common duct                                                                                                                                                                                                                              |
| 47711           | High | 1  | Excision of bile duct tumor, with or without primary repair of bile duct; extrahepatic                                                                                                                                                                                                              |
| <i>Thoracic</i> |      |    |                                                                                                                                                                                                                                                                                                     |



|       |      |     |                                                                                                                                                                                            |
|-------|------|-----|--------------------------------------------------------------------------------------------------------------------------------------------------------------------------------------------|
| 31645 | Low  | 178 | Bronchoscopy, rigid or flexible, including fluoroscopic guidance, when performed; with therapeutic aspiration of tracheobronchial tree, initial (eg, drainage of lung abscess)             |
| 32551 | Low  | 53  | Tube thoracostomy, includes connection to drainage system (eg, water seal), when performed, open                                                                                           |
| 32651 | High | 15  | Thoracoscopy, surgical; with partial pulmonary decortication                                                                                                                               |
| 43281 | High | 12  | Laparoscopy, surgical, repair of paraesophageal hernia, includes fundoplasty, when performed; without implantation of mesh                                                                 |
| 21627 | High | 11  | Sternal debridement                                                                                                                                                                        |
| 43212 | Low  | 7   | Esophagoscopy, flexible, transoral; with placement of endoscopic stent (includes pre- and post-dilation and guide wire passage, when performed)                                            |
| 39010 | High | 6   | Mediastinotomy with exploration, drainage, removal of foreign body, or biopsy; transthoracic approach, including either transthoracic or median sternotomy                                 |
| 32666 | High | 5   | Thoracoscopy, surgical; with therapeutic wedge resection (eg, mass, nodule), initial unilateral                                                                                            |
| 32225 | High | 4   | Decortication, pulmonary ; partial                                                                                                                                                         |
| 32320 | High | 4   | Decortication and parietal pleurectomy                                                                                                                                                     |
| 43124 | High | 4   | Total or partial esophagectomy, without reconstruction (any approach), with cervical esophagostomy                                                                                         |
| 32220 | High | 3   | Decortication, pulmonary ; total                                                                                                                                                           |
| 32480 | High | 3   | Removal of lung, other than pneumonectomy; single lobe (lobectomy)                                                                                                                         |
| 32652 | High | 3   | Thoracoscopy, surgical; with total pulmonary decortication, including intrapleural pneumonolysis                                                                                           |
| 33244 | High | 3   | Removal of single or dual chamber implantable defibrillator electrode(s); by transvenous extraction                                                                                        |
| 33980 | High | 3   | Removal of ventricular assist device, implantable intracorporeal, single ventricle                                                                                                         |
| 33992 | High | 3   | Removal of percutaneous ventricular assist device at separate and distinct session from insertion                                                                                          |
| 39000 | High | 3   | Mediastinotomy with exploration, drainage, removal of foreign body, or biopsy; cervical approach                                                                                           |
| 32150 | High | 2   | Thoracotomy; with removal of intrapleural foreign body or fibrin deposit                                                                                                                   |
| 32653 | High | 2   | Thoracoscopy, surgical; with removal of intrapleural foreign body or fibrin deposit                                                                                                        |
| 33233 | High | 2   | Removal of permanent pacemaker pulse generator only                                                                                                                                        |
| 32552 | Low  | 1   | Removal of indwelling tunneled pleural catheter with cuff                                                                                                                                  |
| 33238 | High | 1   | Removal of permanent transvenous electrode(s) by thoracotomy                                                                                                                               |
| 33241 | High | 1   | Removal of implantable defibrillator pulse generator only                                                                                                                                  |
| 33243 | High | 1   | Removal of single or dual chamber implantable defibrillator electrode(s); by thoracotomy                                                                                                   |
| 33977 | High | 1   | Removal of ventricular assist device; extracorporeal, single ventricle                                                                                                                     |
| 43310 | High | 1   | Esophagoplasty (plastic repair or reconstruction), thoracic approach; without repair of tracheoesophageal fistula                                                                          |
| 43352 | High | 1   | Esophagostomy, fistulization of esophagus, external; cervical approach                                                                                                                     |
| 43360 | High | 1   | Gastrointestinal reconstruction for previous esophagectomy, for obstructing esophageal lesion or fistula, or for previous esophageal exclusion; with stomach, with or without pyloroplasty |

|                                 |      |     |                                                                                                                                                                                                                                            |
|---------------------------------|------|-----|--------------------------------------------------------------------------------------------------------------------------------------------------------------------------------------------------------------------------------------------|
| 43415                           | High | 1   | Suture of esophageal wound or injury; transthoracic or transabdominal approach                                                                                                                                                             |
| <i>Urologic and gynecologic</i> |      |     |                                                                                                                                                                                                                                            |
| 52332                           | Low  | 481 | Cystourethroscopy, with insertion of indwelling ureteral stent (eg, Gibbons or double-J type)                                                                                                                                              |
| 50432                           | Low  | 55  | Placement of nephrostomy catheter, percutaneous, including diagnostic nephrostogram and/or ureterogram when performed, imaging guidance (eg, ultrasound and/or fluoroscopy) and all associated radiological supervision and interpretation |
| 52352                           | Low  | 38  | Cystourethroscopy, with ureteroscopy and/or pyeloscopy; with removal or manipulation of calculus (ureteral catheterization is included)                                                                                                    |
| 52000                           | Low  | 32  | Cystourethroscopy                                                                                                                                                                                                                          |
| 50435                           | Low  | 19  | Exchange nephrostomy catheter, percutaneous, including diagnostic nephrostogram and/or ureterogram when performed, imaging guidance (eg, ultrasound and/or fluoroscopy) and all associated radiological supervision and interpretation     |
| 52310                           | Low  | 11  | Cystourethroscopy, with removal of foreign body, calculus, or ureteral stent from urethra or bladder ; simple                                                                                                                              |
| 54700                           | Low  | 11  | Incision and drainage of epididymis, testis and/or scrotal space (eg, abscess or hematoma)                                                                                                                                                 |
| 51102                           | Low  | 10  | Aspiration of bladder; with insertion of suprapubic catheter                                                                                                                                                                               |
| 52281                           | Low  | 9   | Cystourethroscopy, with calibration and/or dilation of urethral stricture or stenosis, with or without meatotomy, with or without injection procedure for cystography, male or female                                                      |
| 56405                           | Low  | 9   | Incision and drainage of vulva or perineal abscess                                                                                                                                                                                         |
| 51865                           | High | 6   | Cystorrhaphy, suture of bladder wound, injury or rupture; complicated                                                                                                                                                                      |
| 55100                           | Low  | 6   | Drainage of scrotal wall abscess                                                                                                                                                                                                           |
| 51040                           | High | 4   | Cystostomy, cystotomy with drainage                                                                                                                                                                                                        |
| 51705                           | Low  | 4   | Change of cystostomy tube; simple                                                                                                                                                                                                          |
| 51860                           | High | 3   | Cystorrhaphy, suture of bladder wound, injury or rupture; simple                                                                                                                                                                           |
| 52330                           | Low  | 3   | Cystourethroscopy (including ureteral catheterization); with manipulation, without removal of ureteral calculus                                                                                                                            |
| 50370                           | High | 2   | Removal of transplanted renal allograft                                                                                                                                                                                                    |
| 52700                           | Low  | 2   | Transurethral drainage of prostatic abscess                                                                                                                                                                                                |
| 54406                           | High | 2   | Removal of all components of a multi-component, inflatable penile prosthesis without replacement of prosthesis                                                                                                                             |
| 50040                           | Low  | 1   | Nephrostomy, nephrotomy with drainage                                                                                                                                                                                                      |
| 50395                           | Low  | 1   | Introduction of guide into renal pelvis and/or ureter with dilation to establish nephrostomy tract, percutaneous                                                                                                                           |
| 53446                           | High | 1   | Removal of inflatable urethral/bladder neck sphincter, including pump, reservoir, and cuff                                                                                                                                                 |
| 53620                           | Low  | 1   | Dilation of urethral stricture by passage of filiform and follower, male; initial                                                                                                                                                          |
| 54015                           | Low  | 1   | Incision and drainage of penis, deep                                                                                                                                                                                                       |

|                               |      |    |                                                                                                                                                                                                       |
|-------------------------------|------|----|-------------------------------------------------------------------------------------------------------------------------------------------------------------------------------------------------------|
| 54415                         | High | 1  | Removal of non-inflatable (semi-rigid) or inflatable (self-contained) penile prosthesis, without replacement of prosthesis                                                                            |
| 57010                         | Low  | 1  | Colpotomy; with drainage of pelvic abscess                                                                                                                                                            |
| <i>Orthopedic and Cranial</i> |      |    |                                                                                                                                                                                                       |
| 11044                         | High | 82 | Debridement, bone (includes epidermis, dermis, subcutaneous tissue, muscle and/or fascia, if performed); first 20 sq cm or less                                                                       |
| 28820                         | High | 47 | Amputation, toe; metatarsophalangeal joint                                                                                                                                                            |
| 28810                         | High | 40 | Amputation, metatarsal, with toe, single                                                                                                                                                              |
| 28805                         | High | 34 | Amputation, foot; transmetatarsal                                                                                                                                                                     |
| 28825                         | High | 30 | Amputation, toe; interphalangeal joint                                                                                                                                                                |
| 27880                         | High | 27 | Amputation, leg, through tibia and fibula                                                                                                                                                             |
| 22015                         | High | 26 | Incision and drainage, open, of deep abscess (subfascial), posterior spine; lumbar, sacral, or lumbosacral                                                                                            |
| 27310                         | High | 26 | Arthroscopy, knee, with exploration, drainage, or removal of foreign body (eg, infection)                                                                                                             |
| 27889                         | High | 20 | Ankle disarticulation                                                                                                                                                                                 |
| 27488                         | High | 18 | Removal of prosthesis, including total knee prosthesis, methylmethacrylate with or without insertion of spacer, knee                                                                                  |
| 20680                         | High | 17 | Removal of implant; deep (eg, buried wire, pin, screw, metal band, nail, rod or plate)                                                                                                                |
| 27598                         | High | 15 | Disarticulation at knee                                                                                                                                                                               |
| 27590                         | High | 13 | Amputation, thigh, through femur, any level                                                                                                                                                           |
| 62256                         | High | 12 | Removal of complete cerebrospinal fluid shunt system; without replacement                                                                                                                             |
| 27882                         | High | 11 | Amputation, leg, through tibia and fibula; open, circular (guillotine)                                                                                                                                |
| 61601                         | High | 11 | Resection or excision of neoplastic, vascular or infectious lesion of base of anterior cranial fossa; intradural, including dural repair, with or without graft                                       |
| 29871                         | High | 10 | Arthroscopy, knee, surgical; for infection, lavage and drainage                                                                                                                                       |
| 22010                         | High | 8  | Incision and drainage, open, of deep abscess (subfascial), posterior spine; cervical, thoracic, or cervicothoracic                                                                                    |
| 61514                         | High | 8  | Craniectomy, trephination, bone flap craniotomy; for excision of brain abscess, supratentorial                                                                                                        |
| 11012                         | High | 7  | Debridement including removal of foreign material at the site of an open fracture and/or an open dislocation (eg, excisional debridement); skin, subcutaneous tissue, muscle fascia, muscle, and bone |
| 11047                         | High | 7  | Debridement, bone (includes epidermis, dermis, subcutaneous tissue, muscle and/or fascia, if performed); each additional 20 sq cm, or part thereof                                                    |
| 28005                         | High | 7  | Incision, bone cortex (eg, osteomyelitis or bone abscess), foot                                                                                                                                       |
| 41008                         | Low  | 7  | Intraoral incision and drainage of abscess, cyst, or hematoma of tongue or floor of mouth; submandibular space                                                                                        |
| 41017                         | Low  | 7  | Extraoral incision and drainage of abscess, cyst, or hematoma of floor of mouth; submandibular                                                                                                        |

|       |      |   |                                                                                                                                                                                                                              |
|-------|------|---|------------------------------------------------------------------------------------------------------------------------------------------------------------------------------------------------------------------------------|
| 22852 | High | 6 | Removal of posterior segmental instrumentation                                                                                                                                                                               |
| 25040 | High | 6 | Arthrotomy, radiocarpal or midcarpal joint, with exploration, drainage, or removal of foreign body                                                                                                                           |
| 27091 | High | 6 | Removal of hip prosthesis; complicated, including total hip prosthesis, methylmethacrylate with or without insertion of spacer                                                                                               |
| 28122 | High | 6 | Partial excision (craterization, saucerization, sequestrectomy, or diaphysectomy) bone (eg, osteomyelitis or bossing); tarsal or metatarsal bone, except talus or calcaneus                                                  |
| 27592 | High | 5 | Amputation, thigh, through femur, any level; open, circular (guillotine)                                                                                                                                                     |
| 28120 | High | 5 | Partial excision (craterization, saucerization, sequestrectomy, or diaphysectomy) bone (eg, osteomyelitis or bossing); talus or calcaneus                                                                                    |
| 42720 | High | 5 | Incision and drainage abscess; retropharyngeal or parapharyngeal, intraoral approach                                                                                                                                         |
| 61320 | High | 5 | Craniectomy or craniotomy, drainage of intracranial abscess; supratentorial                                                                                                                                                  |
| 62365 | High | 5 | Removal of subcutaneous reservoir or pump, previously implanted for intrathecal or epidural infusion                                                                                                                         |
| 20694 | High | 4 | Removal, under anesthesia, of external fixation system                                                                                                                                                                       |
| 42725 | High | 4 | Incision and drainage abscess; retropharyngeal or parapharyngeal, external approach                                                                                                                                          |
| 61607 | High | 4 | Resection or excision of neoplastic, vascular or infectious lesion of parasellar area, cavernous sinus, clivus or midline skull base; extradural                                                                             |
| 62355 | High | 4 | Removal of previously implanted intrathecal or epidural catheter                                                                                                                                                             |
| 15937 | High | 3 | Excision, sacral pressure ulcer, in preparation for muscle or myocutaneous flap or skin graft closure; with ostectomy                                                                                                        |
| 23030 | High | 3 | Incision and drainage, shoulder area; deep abscess or hematoma                                                                                                                                                               |
| 24900 | High | 3 | Amputation, arm through humerus; with primary closure                                                                                                                                                                        |
| 27610 | High | 3 | Arthrotomy, ankle, including exploration, drainage, or removal of foreign body                                                                                                                                               |
| 42700 | High | 3 | Incision and drainage abscess; peritonsillar                                                                                                                                                                                 |
| 61616 | High | 3 | Resection or excision of neoplastic, vascular or infectious lesion of base of posterior cranial fossa, jugular foramen, foramen magnum, or C1-C3 vertebral bodies; intradural, including dural repair, with or without graft |
| 63661 | High | 3 | Removal of spinal neurostimulator electrode percutaneous array(s), including fluoroscopy, when performed                                                                                                                     |
| 22830 | High | 2 | Exploration of spinal fusion                                                                                                                                                                                                 |
| 23931 | High | 2 | Incision and drainage, upper arm or elbow area; bursa                                                                                                                                                                        |
| 26910 | Low  | 2 | Amputation, metacarpal, with finger or thumb (ray amputation), single, with or without interosseous transfer                                                                                                                 |
| 27596 | High | 2 | Amputation, thigh, through femur, any level; re-amputation                                                                                                                                                                   |
| 28124 | High | 2 | Partial excision (craterization, saucerization, sequestrectomy, or diaphysectomy) bone (eg, osteomyelitis or bossing); phalanx of toe                                                                                        |
| 40800 | Low  | 2 | Drainage of abscess, cyst, hematoma, vestibule of mouth; simple                                                                                                                                                              |

|       |      |   |                                                                                                                                                                          |
|-------|------|---|--------------------------------------------------------------------------------------------------------------------------------------------------------------------------|
| 41000 | Low  | 2 | Intraoral incision and drainage of abscess, cyst, or hematoma of tongue or floor of mouth; lingual                                                                       |
| 41016 | Low  | 2 | Extraoral incision and drainage of abscess, cyst, or hematoma of floor of mouth; submental                                                                               |
| 41800 | Low  | 2 | Drainage of abscess, cyst, hematoma from dentoalveolar structures                                                                                                        |
| 11010 | High | 1 | Debridement including removal of foreign material at the site of an open fracture and/or an open dislocation (eg, excisional debridement); skin and subcutaneous tissues |
| 20670 | Low  | 1 | Removal of implant; superficial (eg, buried wire, pin or rod)                                                                                                            |
| 21025 | High | 1 | Excision of bone (eg, for osteomyelitis or bone abscess); mandible                                                                                                       |
| 21502 | High | 1 | Incision and drainage, deep abscess or hematoma, soft tissues of neck or thorax; with partial rib ostectomy                                                              |
| 22855 | High | 1 | Removal of anterior instrumentation                                                                                                                                      |
| 23044 | High | 1 | Arthrotomy, acromioclavicular, sternoclavicular joint, including exploration, drainage, or removal of foreign body                                                       |
| 23920 | High | 1 | Disarticulation of shoulder                                                                                                                                              |
| 24000 | High | 1 | Arthrotomy, elbow, including exploration, drainage, or removal of foreign body                                                                                           |
| 24160 | High | 1 | Removal of prosthesis, includes debridement and synovectomy when performed; humeral and ulnar components                                                                 |
| 24930 | High | 1 | Amputation, arm through humerus; re-amputation                                                                                                                           |
| 25900 | High | 1 | Amputation, forearm, through radius and ulna                                                                                                                             |
| 25905 | High | 1 | Amputation, forearm, through radius and ulna; open, circular (guillotine)                                                                                                |
| 26236 | Low  | 1 | Partial excision (craterization, saucerization, or diaphysectomy) bone (eg, osteomyelitis); distal phalanx of finger                                                     |
| 27070 | High | 1 | Partial excision, wing of ilium, symphysis pubis, or greater trochanter of femur, (craterization, saucerization) (eg, osteomyelitis or bone abscess); superficial        |
| 27090 | High | 1 | Removal of hip prosthesis;                                                                                                                                               |
| 27290 | High | 1 | Interpelviabdominal amputation (hindquarter amputation)                                                                                                                  |
| 27295 | High | 1 | Disarticulation of hip                                                                                                                                                   |
| 27331 | High | 1 | Arthrotomy, knee; including joint exploration, biopsy, or removal of loose or foreign bodies                                                                             |
| 27360 | High | 1 | Partial excision (craterization, saucerization, or diaphysectomy) bone, femur, proximal tibia and/or fibula (eg, osteomyelitis or bone abscess)                          |
| 27372 | High | 1 | Removal of foreign body, deep, thigh region or knee area                                                                                                                 |
| 27604 | High | 1 | Incision and drainage, leg or ankle; infected bursa                                                                                                                      |
| 27607 | High | 1 | Incision (eg, osteomyelitis or bone abscess), leg or ankle                                                                                                               |
| 27620 | High | 1 | Arthrotomy, ankle, with joint exploration, with or without biopsy, with or without removal of loose or foreign body                                                      |
| 27886 | High | 1 | Amputation, leg, through tibia and fibula; re-amputation                                                                                                                 |
| 28800 | High | 1 | Amputation, foot; midtarsal (eg, Chopart type procedure)                                                                                                                 |

|                    |      |     |                                                                                                                                                                                          |
|--------------------|------|-----|------------------------------------------------------------------------------------------------------------------------------------------------------------------------------------------|
| 41005              | Low  | 1   | Intraoral incision and drainage of abscess, cyst, or hematoma of tongue or floor of mouth; sublingual, superficial                                                                       |
| 41007              | Low  | 1   | Intraoral incision and drainage of abscess, cyst, or hematoma of tongue or floor of mouth; submental space                                                                               |
| 41015              | Low  | 1   | Extraoral incision and drainage of abscess, cyst, or hematoma of floor of mouth; sublingual                                                                                              |
| 42310              | Low  | 1   | Drainage of abscess; submaxillary or sublingual, intraoral                                                                                                                               |
| 42320              | Low  | 1   | Drainage of abscess; submaxillary, external                                                                                                                                              |
| 61150              | High | 1   | Burr hole(s) or trephine; with drainage of brain abscess or cyst                                                                                                                         |
| 61606              | High | 1   | Resection or excision of neoplastic, vascular or infectious lesion of infratemporal fossa, parapharyngeal space, petrous apex; intradural, including dural repair, with or without graft |
| 63662              | High | 1   | Removal of spinal neurostimulator electrode plate/paddle(s) placed via laminotomy or laminectomy, including fluoroscopy, when performed                                                  |
| 63688              | High | 1   | Revision or removal of implanted spinal neurostimulator pulse generator or receiver                                                                                                      |
| <i>Soft Tissue</i> |      |     |                                                                                                                                                                                          |
| 11042              | High | 251 | Debridement, subcutaneous tissue (includes epidermis and dermis, if performed); first 20 sq cm or less                                                                                   |
| 11043              | High | 155 | Debridement, muscle and/or fascia (includes epidermis, dermis, and subcutaneous tissue, if performed); first 20 sq cm or less                                                            |
| 11004              | High | 85  | Debridement of skin, subcutaneous tissue, muscle and fascia for necrotizing soft tissue infection; external genitalia and perineum                                                       |
| 10060              | Low  | 55  | Incision and drainage of abscess (eg, carbuncle, suppurative hidradenitis, cutaneous or subcutaneous abscess, cyst, furuncle, or paronychia); simple or single                           |
| 10061              | High | 54  | Incision and drainage of abscess (eg, carbuncle, suppurative hidradenitis, cutaneous or subcutaneous abscess, cyst, furuncle, or paronychia); complicated or multiple                    |
| 10160              | Low  | 45  | Puncture aspiration of abscess, hematoma, bulla, or cyst                                                                                                                                 |
| 10030              | Low  | 34  | Image-guided fluid collection drainage by catheter (eg, abscess, hematoma, seroma, lymphocele, cyst), soft tissue (eg, extremity, abdominal wall, neck), percutaneous                    |
| 11046              | High | 34  | Debridement, muscle and/or fascia (includes epidermis, dermis, and subcutaneous tissue, if performed); each additional 20 sq cm, or part thereof                                         |
| 11045              | High | 31  | Debridement, subcutaneous tissue (includes epidermis and dermis, if performed); each additional 20 sq cm, or part thereof                                                                |
| 11005              | High | 29  | Debridement of skin, subcutaneous tissue, muscle and fascia for necrotizing soft tissue infection; abdominal wall, with or without fascial closure                                       |
| 27301              | High | 28  | Incision and drainage, deep abscess, bursa, or hematoma, thigh or knee region                                                                                                            |
| 36590              | Low  | 27  | Removal of tunneled central venous access device, with subcutaneous port or pump, central or peripheral insertion                                                                        |
| 35903              | High | 26  | Excision of infected graft; extremity                                                                                                                                                    |
| 21501              | High | 20  | Incision and drainage, deep abscess or hematoma, soft tissues of neck or thorax                                                                                                          |

|       |      |    |                                                                                                                                                                                                            |
|-------|------|----|------------------------------------------------------------------------------------------------------------------------------------------------------------------------------------------------------------|
| 46050 | Low  | 20 | Incision and drainage, perianal abscess, superficial                                                                                                                                                       |
| 27603 | High | 18 | Incision and drainage, leg or ankle; deep abscess or hematoma                                                                                                                                              |
| 20005 | High | 16 | Incision and drainage of soft tissue abscess, subfascial (ie, involves the soft tissue below the deep fascia)                                                                                              |
| 25028 | Low  | 16 | Incision and drainage, forearm and/or wrist; deep abscess or hematoma                                                                                                                                      |
| 26990 | High | 13 | Incision and drainage, pelvis or hip joint area; deep abscess or hematoma                                                                                                                                  |
| 11006 | High | 12 | Debridement of skin, subcutaneous tissue, muscle and fascia for necrotizing soft tissue infection; external genitalia, perineum and abdominal wall, with or without fascial closure                        |
| 28002 | High | 12 | Incision and drainage below fascia, with or without tendon sheath involvement, foot; single bursal space                                                                                                   |
| 23930 | High | 7  | Incision and drainage, upper arm or elbow area; deep abscess or hematoma                                                                                                                                   |
| 25025 | Low  | 5  | Decompression fasciotomy, forearm and/or wrist, flexor AND extensor compartment; with debridement of nonviable muscle and/or nerve                                                                         |
| 11000 | High | 4  | Debridement of extensive eczematous or infected skin; up to 10% of body surface                                                                                                                            |
| 19020 | High | 4  | Mastotomy with exploration or drainage of abscess, deep                                                                                                                                                    |
| 10120 | Low  | 3  | Incision and removal of foreign body, subcutaneous tissues; simple                                                                                                                                         |
| 10121 | Low  | 3  | Incision and removal of foreign body, subcutaneous tissues; complicated                                                                                                                                    |
| 28003 | High | 3  | Incision and drainage below fascia, with or without tendon sheath involvement, foot; multiple areas                                                                                                        |
| 11770 | Low  | 2  | Excision of pilonidal cyst or sinus; simple                                                                                                                                                                |
| 11771 | High | 2  | Excision of pilonidal cyst or sinus; extensive                                                                                                                                                             |
| 15940 | High | 2  | Excision, ischial pressure ulcer, with primary suture                                                                                                                                                      |
| 25023 | Low  | 2  | Decompression fasciotomy, forearm and/or wrist, flexor OR extensor compartment; with debridement of nonviable muscle and/or nerve                                                                          |
| 27892 | High | 2  | Decompression fasciotomy, leg; anterior and/or lateral compartments only, with debridement of nonviable muscle and/or nerve                                                                                |
| 35907 | High | 2  | Excision of infected graft; abdomen                                                                                                                                                                        |
| 11971 | High | 1  | Removal of tissue expander(s) without insertion of prosthesis                                                                                                                                              |
| 15931 | High | 1  | Excision, sacral pressure ulcer, with primary suture                                                                                                                                                       |
| 27057 | High | 1  | Decompression fasciotomy(ies), pelvic (buttock) compartment(s) (eg, gluteus medius-minimus, gluteus maximus, iliopsoas, and/or tensor fascia lata muscle) with debridement of nonviable muscle, unilateral |
| 27497 | High | 1  | Decompression fasciotomy, thigh and/or knee, 1 compartment (flexor or extensor or adductor); with debridement of nonviable muscle and/or nerve                                                             |
| 27499 | High | 1  | Decompression fasciotomy, thigh and/or knee, multiple compartments; with debridement of nonviable muscle and/or nerve                                                                                      |

|       |      |   |                                             |
|-------|------|---|---------------------------------------------|
| 28190 | Low  | 1 | Removal of foreign body, foot; subcutaneous |
| 28193 | High | 1 | Removal of foreign body, foot; complicated  |
| 46020 | Low  | 1 | Placement of seton                          |

<sup>a</sup>Includes only procedures defined by modified Delphi consensus methodology and validated through clinical adjudication which were identified within the primary cohort source control including.

<sup>a</sup>The Operative Stress Score guided the categorization of procedures as low (Operative Stress Score, 1) or high (Operative Stress Score, 2-5). Procedures not rated by the Operative Stress Score were provided a stress category which was consistent with similar procedure with a rating.

*Abbreviations:* CPT: Current Procedural Terminology.



**eTable 3. Most common source control intervention families**

| CPT Code <sup>a</sup>                                            | Procedure Description <sup>b</sup>                                                                                                                                                                 | Count <sup>c</sup> |
|------------------------------------------------------------------|----------------------------------------------------------------------------------------------------------------------------------------------------------------------------------------------------|--------------------|
| <i>Exploratory Laparotomy or Laparoscopy Intervention Family</i> |                                                                                                                                                                                                    |                    |
| 43659                                                            | Unlisted laparoscopy procedure, stomach                                                                                                                                                            | 12                 |
| 43840                                                            | Gastrorrhaphy, suture of perforated duodenal or gastric ulcer, wound, or injury                                                                                                                    | 39                 |
| 44050                                                            | Reduction of volvulus, intussusception, internal hernia, by laparotomy                                                                                                                             | 13                 |
| 44120                                                            | Enterectomy, resection of small intestine; single resection and anastomosis                                                                                                                        | 149                |
| 44125                                                            | Enterectomy, resection of small intestine; with enterostomy                                                                                                                                        | 15                 |
| 44130                                                            | Enteroenterostomy, anastomosis of intestine, with or without cutaneous enterostomy                                                                                                                 | 22                 |
| 44140                                                            | Colectomy, partial; with anastomosis                                                                                                                                                               | 92                 |
| 44141                                                            | Colectomy, partial; with skin level cecostomy or colostomy                                                                                                                                         | 52                 |
| 44143                                                            | Colectomy, partial; with end colostomy and closure of distal segment (Hartmann type procedure)                                                                                                     | 75                 |
| 44144                                                            | Colectomy, partial; with resection, with colostomy or ileostomy and creation of mucofistula                                                                                                        | 15                 |
| 44145                                                            | Colectomy, partial; with coloproctostomy (low pelvic anastomosis)                                                                                                                                  | 17                 |
| 44150                                                            | Colectomy, total, abdominal, without proctectomy; with ileostomy or ileoproctostomy                                                                                                                | 25                 |
| 44160                                                            | Colectomy, partial, with removal of terminal ileum with ileocolostomy                                                                                                                              | 61                 |
| 44180                                                            | Laparoscopy, surgical, enterolysis (freeing of intestinal adhesion)                                                                                                                                | 18                 |
| 44187                                                            | Laparoscopy, surgical; ileostomy or jejunostomy, non-tube                                                                                                                                          | 15                 |
| 44310                                                            | Ileostomy or jejunostomy, non-tube                                                                                                                                                                 | 32                 |
| 44320                                                            | Colostomy or skin level cecostomy                                                                                                                                                                  | 22                 |
| 44602                                                            | Suture of small intestine (enterorrhaphy) for perforated ulcer, diverticulum, wound, injury or rupture; single perforation                                                                         | 18                 |
| 49000                                                            | Exploratory laparotomy, exploratory celiotomy with or without biopsy(s)                                                                                                                            | 113                |
| 49002                                                            | Reopening of recent laparotomy                                                                                                                                                                     | 100                |
| 49561                                                            | Repair initial incisional or ventral hernia; incarcerated or strangulated                                                                                                                          | 34                 |
| 49587                                                            | Repair umbilical hernia, age 5 years or older; incarcerated or strangulated                                                                                                                        | 13                 |
| <i>Biliary Decompression Intervention Family</i>                 |                                                                                                                                                                                                    |                    |
| 43260                                                            | ERCP diagnostic, including collection of specimen(s) by brushing or washing, when performed                                                                                                        | 46                 |
| 43261                                                            | ERCP; biopsy, single or multiple                                                                                                                                                                   | 50                 |
| 43262                                                            | ERCP; sphincterotomy/papillotomy                                                                                                                                                                   | 202                |
| 43264                                                            | ERCP; removal of calculi/debris from biliary/pancreatic duct(s)                                                                                                                                    | 220                |
| 43265                                                            | ERCP; destruction of calculi, any method (eg, mechanical, electrohydraulic, lithotripsy)                                                                                                           | 24                 |
| 43266                                                            | Esophagogastroduodenoscopy, flexible, transoral; with placement of endoscopic stent (includes pre- and post-dilation and guide wire passage, when performed)                                       | 22                 |
| 43274                                                            | ERCP; placement of endoscopic stent into biliary or pancreatic duct, including pre- and post-dilation and guide wire passage, when performed, including sphincterotomy, when performed, each stent | 167                |
| 43275                                                            | ERCP; removal of foreign body(s) or stent(s) from biliary/pancreatic duct(s)                                                                                                                       | 15                 |

|                                                       |       |                                                                                                                                                                                                                                                                                                     |     |
|-------------------------------------------------------|-------|-----------------------------------------------------------------------------------------------------------------------------------------------------------------------------------------------------------------------------------------------------------------------------------------------------|-----|
|                                                       | 43276 | ERCP; removal and exchange of stent(s), biliary or pancreatic duct, including pre- and post-dilation and guide wire passage, when performed, including sphincterotomy, when performed, each stent exchanged                                                                                         | 41  |
|                                                       | 43277 | ERCP; trans-endoscopic balloon dilation of biliary/pancreatic duct(s) or of ampulla (sphincteroplasty), including sphincterotomy, when performed, each duct                                                                                                                                         | 28  |
|                                                       | 47534 | Placement of biliary drainage catheter, percutaneous, including diagnostic cholangiography when performed, imaging guidance (eg, ultrasound and/or fluoroscopy), and all associated radiological supervision and interpretation; internal-external                                                  | 24  |
|                                                       | 47536 | Exchange of biliary drainage catheter (eg, external, internal-external, or conversion of internal-external to external only), percutaneous, including diagnostic cholangiography when performed, imaging guidance (eg, fluoroscopy), and all associated radiological supervision and interpretation | 21  |
| <i>Urinary Decompression Intervention Family</i>      |       |                                                                                                                                                                                                                                                                                                     |     |
|                                                       | 52000 | Cystourethroscopy                                                                                                                                                                                                                                                                                   | 39  |
|                                                       | 52281 | Cystourethroscopy, with calibration and/or dilation of urethral stricture or stenosis, with or without meatotomy, with or without injection procedure for cystography, male or female                                                                                                               | 11  |
|                                                       | 52310 | Cystourethroscopy, with removal of foreign body, calculus, or ureteral stent from urethra or bladder ; simple                                                                                                                                                                                       | 13  |
|                                                       | 52332 | Cystourethroscopy, with insertion of indwelling ureteral stent (eg, Gibbons or double-J type)                                                                                                                                                                                                       | 510 |
|                                                       | 52352 | Cystourethroscopy, with ureteroscopy and/or pyeloscopy; with removal or manipulation of calculus (ureteral catheterization is included)                                                                                                                                                             | 50  |
|                                                       | 50432 | Placement of nephrostomy catheter, percutaneous, including diagnostic nephrostogram and/or ureterogram when performed, imaging guidance (eg, ultrasound and/or fluoroscopy) and all associated radiological supervision and interpretation                                                          | 61  |
|                                                       | 50435 | Exchange nephrostomy catheter, percutaneous, including diagnostic nephrostogram and/or ureterogram when performed, imaging guidance (eg, ultrasound and/or fluoroscopy) and all associated radiological supervision and interpretation                                                              | 20  |
| <i>Debridement of Soft Tissue Intervention Family</i> |       |                                                                                                                                                                                                                                                                                                     |     |
|                                                       | 11004 | Debridement of skin, subcutaneous tissue, muscle and fascia for necrotizing soft tissue infection; external genitalia and perineum                                                                                                                                                                  | 136 |
|                                                       | 11005 | Debridement of skin, subcutaneous tissue, muscle and fascia for necrotizing soft tissue infection; abdominal wall, with or without fascial closure                                                                                                                                                  | 49  |
|                                                       | 11006 | Debridement of skin, subcutaneous tissue, muscle and fascia for necrotizing soft tissue infection; external genitalia, perineum and abdominal wall, with or without fascial closure                                                                                                                 | 25  |
|                                                       | 11042 | Debridement, subcutaneous tissue (includes epidermis and dermis, if performed); first 20 sq cm or less                                                                                                                                                                                              | 412 |
|                                                       | 11043 | Debridement, muscle and/or fascia (includes epidermis, dermis, and subcutaneous tissue, if performed); first 20 sq cm or less                                                                                                                                                                       | 269 |
|                                                       | 11045 | Debridement, subcutaneous tissue (includes epidermis and dermis, if performed); each additional 20 sq cm, or part thereof (List separately in addition to code for primary procedure)                                                                                                               | 71  |
|                                                       | 11046 | Debridement, muscle and/or fascia (includes epidermis, dermis, and subcutaneous tissue, if performed); each additional 20 sq cm, or part thereof (List separately in addition to code for primary procedure)                                                                                        | 85  |

| <i>Incision and Percutaneous Drainage Intervention Family</i> |                                                                                                                                                                            |     |
|---------------------------------------------------------------|----------------------------------------------------------------------------------------------------------------------------------------------------------------------------|-----|
| 10030                                                         | Image-guided fluid collection drainage by catheter (eg, abscess, hematoma, seroma, lymphocele, cyst), soft tissue (eg, extremity, abdominal wall, neck), percutaneous      | 35  |
| 10060                                                         | Incision and drainage of abscess (eg, carbuncle, suppurative hidradenitis, cutaneous or subcutaneous abscess, cyst, furuncle, or paronychia); simple or single             | 82  |
| 10061                                                         | Incision and drainage of abscess (eg, carbuncle, suppurative hidradenitis, cutaneous or subcutaneous abscess, cyst, furuncle, or paronychia); complicated or multiple      | 85  |
| 10160                                                         | Puncture aspiration of abscess, hematoma, bulla, or cyst                                                                                                                   | 52  |
| 10160                                                         | Puncture aspiration of abscess, hematoma, bulla, or cyst                                                                                                                   | 52  |
| 20005                                                         | Incision and drainage of soft tissue abscess, subfascial (ie, involves the soft tissue below the deep fascia)                                                              | 20  |
| 21501                                                         | Incision and drainage, deep abscess or hematoma, soft tissues of neck or thorax                                                                                            | 32  |
| 22010                                                         | Incision and drainage, open, of deep abscess (subfascial), posterior spine; cervical, thoracic, or cervicothoracic                                                         | 11  |
| 22015                                                         | Incision and drainage, open, of deep abscess (subfascial), posterior spine; lumbar, sacral, or lumbosacral                                                                 | 33  |
| 25028                                                         | Incision and drainage, forearm and/or wrist; deep abscess or hematoma                                                                                                      | 21  |
| 26990                                                         | Incision and drainage, pelvis or hip joint area; deep abscess or hematoma                                                                                                  | 21  |
| 27301                                                         | Incision and drainage, deep abscess, bursa, or hematoma, thigh or knee region                                                                                              | 36  |
| 27603                                                         | Incision and drainage, leg or ankle; deep abscess or hematoma                                                                                                              | 24  |
| 46040                                                         | Incision and drainage of ischiorectal and/or perirectal abscess                                                                                                            | 55  |
| 46050                                                         | Incision and drainage, perianal abscess, superficial                                                                                                                       | 32  |
| 49405                                                         | Image-guided fluid collection drainage by catheter (eg, abscess, hematoma, seroma, lymphocele, cyst); visceral (eg, kidney, liver, spleen, lung/mediastinum), percutaneous | 35  |
| 49406                                                         | Image-guided fluid collection drainage by catheter (eg, abscess, hematoma, seroma, lymphocele, cyst); peritoneal or retroperitoneal, percutaneous                          | 373 |
| 49423                                                         | Exchange of previously placed abscess or cyst drainage catheter under radiological guidance                                                                                | 14  |
| 54700                                                         | Incision and drainage of epididymis, testis and/or scrotal space (eg, abscess or hematoma)                                                                                 | 12  |
| 55100                                                         | Drainage of scrotal wall abscess                                                                                                                                           | 10  |
| 56405                                                         | Incision and drainage of vulva or perineal abscess                                                                                                                         | 11  |

<sup>a</sup> Eligible *Current Procedural Terminology* (CPT) codes included those that occurred >10 times in the primary cohort.

<sup>a</sup> Eligible procedures included those that occurred >500 times in the primary cohort and therefore accounting for >10% of the primary cohort.

<sup>c</sup> Patients may have more than once *Current Procedural Terminology* code per index source control procedure

**eTable 4. Feature summary statistics before and after imputation**

| <b>Feature<sup>a</sup></b>       | <b>Original<sup>b</sup></b> | <b>Imputed<sup>b</sup></b> | <b>Missingness</b> |
|----------------------------------|-----------------------------|----------------------------|--------------------|
| BMI                              | 30.9 (9.6)                  | 30.9 (9.5)                 | 3.9%               |
| Heart Rate, beats/minute         | 98 (21)                     | 98 (21)                    | 5.6%               |
| Systolic BP, mmHg                | 137 (30)                    | 138 (30)                   | 5.8%               |
| Diastolic BP, mmHg               | 77 (17)                     | 77 (18)                    | 6.1%               |
| O <sub>2</sub> Saturation, %     | 94 (5)                      | 94 (5)                     | 6.7%               |
| Respiratory Rate, breaths/minute | 21 (6)                      | 21 (6)                     | 8.5%               |
| Temperature, °C                  | 37.1 (0.8)                  | 37.1 (0.8)                 | 8.5%               |
| Hemoglobin, g/dL                 | 12 (2)                      | 12 (2)                     | 38%                |
| Potassium, mEq/L                 | 4 (1)                       | 4 (1)                      | 38%                |
| Bicarbonate, mEq/L               | 24 (5)                      | 24 (4)                     | 39%                |
| BUN, mg/dL                       | 26 (21)                     | 27 (22)                    | 39%                |
| Chloride, mEq/L                  | 102 (6)                     | 102 (6)                    | 39%                |
| Creatinine, mg/dL                | 1.6 (1.6)                   | 1.7 (1.7)                  | 39%                |
| Glucose, mg/dL                   | 158 (89)                    | 159 (93)                   | 39%                |
| Platelets, x10 <sup>9</sup> /L   | 253 (126)                   | 253 (126)                  | 39%                |
| Sodium, mEq/L                    | 136 (5)                     | 136 (5)                    | 39%                |
| WBC, x10 <sup>3</sup> /L         | 14 (9)                      | 14 (9)                     | 39%                |
| Albumin, g/dL                    | 3.1 (0.8)                   | 3.0 (0.7)                  | 56%                |
| ALT, U/L                         | 77 (228)                    | 76 (206)                   | 56%                |
| AST, U/L                         | 99 (436)                    | 92 (334)                   | 56%                |
| Bilirubin, mg/dL                 | 1.9 (3.4)                   | 2.0 (3.5)                  | 56%                |
| INR                              | 1.5 (1.1)                   | 1.5 (1.2)                  | 58%                |
| Serum Lactate, mmol/L            | 2.7 (2.7)                   | 2.1 (2.2)                  | 76%                |

<sup>a</sup> Age, race, gender, SOFA, and Elixhauser included in imputation, but had 0% missing  
<sup>b</sup> Mean (SD) presented for all values for worst values measured prior to sepsis onset

*Abbreviations:* ALT: alanine transaminase; AST: aspartate transaminase; BMI: body mass index; BP: blood pressure; BUN: blood urea nitrogen; INR: international normalized ratio; SD: standard deviation; SOFA: sequential organ failure assessment score; WBC: white blood cell count

**eTable 5. Cohort characteristics by anatomic location of source control**

| Feature                                            | Overall        | GI and Abdominal | HPB            | Thoracic        | Urologic and Gynecologic | Orthopedic and Cranial | Soft Tissue    |
|----------------------------------------------------|----------------|------------------|----------------|-----------------|--------------------------|------------------------|----------------|
| N                                                  | 4,962          | 1,372 (28%)      | 883 (18%)      | 347 (7%)        | 714 (14%)                | 616 (12%)              | 1,030 (21%)    |
| <i>Patient Characteristics</i>                     |                |                  |                |                 |                          |                        |                |
| Age, years, mean (SD)                              | 62 (16)        | 61 (16)          | 67 (16)        | 61 (15)         | 64 (16)                  | 61 (15)                | 57 (16)        |
| Sex, male, no. (%)                                 | 2,604 (52%)    | 681 (50%)        | 459 (52%)      | 220 (63%)       | 317 (44%)                | 371 (60%)              | 556 (54%)      |
| Race, no. (%) <sup>a</sup>                         |                |                  |                |                 |                          |                        |                |
| White                                              | 4,226 (85%)    | 1,164 (85%)      | 752 (85%)      | 305 (88%)       | 647 (91%)                | 495 (80%)              | 863 (84%)      |
| Black                                              | 422 (9%)       | 118 (9%)         | 54 (6%)        | 16 (5%)         | 50 (7%)                  | 91 (15%)               | 93 (9%)        |
| Other                                              | 314 (6%)       | 90 (7%)          | 77 (9%)        | 26 (7%)         | 17 (2%)                  | 30 (5%)                | 74 (7%)        |
| BMI, mean (SD)                                     | 30.9 (9.6)     | 29.5 (8.8)       | 29.6 (8.1)     | 29.2 (10.3)     | 32.0 (9.7)               | 31.3 (9.2)             | 33.3 (10.9)    |
| SOFA, max within 6hrs, mean (SD) <sup>b</sup>      | 3.8 (2.5)      | 4.3 (2.7)        | 3.7 (2.2)      | 4.5 (2.9)       | 3.5 (1.9)                | 3.2 (2.3)              | 3.7 (2.4)      |
| Elixhauser, mean (SD) <sup>c</sup>                 | 4.0 (2.4)      | 4.2 (2.4)        | 3.4 (2.2)      | 4.5 (2.2)       | 3.5 (2.2)                | 4.5 (2.4)              | 4.1 (2.4)      |
| <i>Selected Vitals and Labs<sup>d</sup></i>        |                |                  |                |                 |                          |                        |                |
| Heart rate, beats/minute, mean (SD)                | 98 (21)        | 101 (23)         | 93 (20)        | 101 (21)        | 97 (21)                  | 94 (20)                | 99 (21)        |
| Respiratory rate, breaths/minute, mean (SD)        | 21 (6)         | 21 (6)           | 20 (5)         | 24 (7)          | 21 (5)                   | 20 (5)                 | 20 (4)         |
| Serum lactate, mmol/L, mean (SD)                   | 2.7 (2.7)      | 3.0 (3.0)        | 2.3 (1.9)      | 2.4 (2.5)       | 2.5 (2.0)                | 3.0 (3.5)              | 2.4 (2.1)      |
| INR, mean (SD)                                     | 1.5 (1.1)      | 1.6 (1.2)        | 1.5 (1.2)      | 1.4 (0.7)       | 1.5 (1.4)                | 1.5 (1.3)              | 1.5 (0.8)      |
| Creatinine, mg/dL, mean (SD)                       | 1.6 (1.6)      | 1.7 (1.7)        | 1.3 (1.0)      | 1.2 (0.9)       | 2.1 (2.1)                | 1.7 (1.8)              | 1.6 (1.7)      |
| Bilirubin, mg/dL, mean (SD)                        | 1.9 (3.4)      | 1.7 (3.3)        | 3.7 (4.9)      | 1.2 (2.1)       | 0.8 (0.7)                | 0.9 (1.5)              | 1.1 (1.7)      |
| <i>Hospital and Source Control Characteristics</i> |                |                  |                |                 |                          |                        |                |
| Mandated Surgeon Availability, no. (%)             |                |                  |                |                 |                          |                        |                |
| In-house 24-hours                                  | 2503 (50.4%)   | 736 (53.6%)      | 467 (52.9%)    | 235 (67.7%)     | 188 (26.3%)              | 328 (53.2%)            | 549 (53.3%)    |
| Available 24-hours                                 | 252 (5.1%)     | 97 (7.1%)        | 40 (4.5%)      | 9 (2.6%)        | 54 (7.6%)                | 12 (1.9%)              | 40 (3.9%)      |
| Not Mandated                                       | 2207 (44.5%)   | 539 (39.3%)      | 376 (42.6%)    | 103 (29.7%)     | 472 (66.1%)              | 276 (44.8%)            | 441 (42.8%)    |
| Transfer Status, no. (%)                           |                |                  |                |                 |                          |                        |                |
| Not transfer                                       | 4219 (85.0%)   | 1174 (85.6%)     | 749 (84.8%)    | 279 (80.4%)     | 665 (93.1%)              | 496 (80.5%)            | 856 (83.1%)    |
| Transfer                                           | 743 (15.0%)    | 198 (14.4%)      | 134 (15.2%)    | 68 (19.6%)      | 49 (6.9%)                | 120 (19.5%)            | 174 (16.9%)    |
| Time to Antibiotics, hours, mean (SD)              | 1.5 (0.2, 3.7) | 1.1 (0.1, 3.8)   | 2.1 (0.5, 4.4) | 0.6 (-0.2, 2.9) | 1.9 (0.6, 4.4)           | 1.5 (0.2, 4.0)         | 1.1 (0.2, 2.7) |

|                                                                                                                                                                                                                                                                                      |                  |                  |                   |                  |                  |                  |                  |
|--------------------------------------------------------------------------------------------------------------------------------------------------------------------------------------------------------------------------------------------------------------------------------------|------------------|------------------|-------------------|------------------|------------------|------------------|------------------|
| Time to Source Control, hours, mean (SD)                                                                                                                                                                                                                                             | 15.4 (5.5, 21.7) | 11.9 (3.5, 19.5) | 17.9 (13.0, 23.5) | 11.0 (1.6, 21.1) | 16.7 (9.3, 22.2) | 17.5 (9.1, 23.0) | 14.8 (3.8, 21.6) |
| Procedural Stress <sup>e</sup> , no. (%)                                                                                                                                                                                                                                             |                  |                  |                   |                  |                  |                  |                  |
| Less stressful                                                                                                                                                                                                                                                                       | 2568 (52%)       | 489 (36%)        | 642 (73%)         | 239 (69%)        | 695 (97%)        | 31 (5%)          | 214 (21%)        |
| More stressful                                                                                                                                                                                                                                                                       | 2394 (48%)       | 883 (64%)        | 241 (27%)         | 108 (31%)        | 19 (3%)          | 585 (95%)        | 816 (79%)        |
| <b>Hospital Utilization and Outcomes</b>                                                                                                                                                                                                                                             |                  |                  |                   |                  |                  |                  |                  |
| Mechanical Ventilation, any, no. (%)                                                                                                                                                                                                                                                 | 1,493 (30%)      | 573 (42%)        | 138 (16%)         | 272 (78%)        | 92 (13%)         | 132 (21%)        | 286 (28%)        |
| Vasopressors, any, no. (%)                                                                                                                                                                                                                                                           | 1,010 (20%)      | 397 (29%)        | 115 (13%)         | 159 (46%)        | 92 (13%)         | 83 (13%)         | 164 (16%)        |
| Admitted to ICU, no. (%)                                                                                                                                                                                                                                                             | 2,219 (45%)      | 765 (56%)        | 268 (30%)         | 301 (87%)        | 221 (31%)        | 232 (38%)        | 432 (42%)        |
| Hospital LOS, days, mean (SD)                                                                                                                                                                                                                                                        | 11.8 (12.3)      | 13.0 (11.2)      | 7.9 (7.3)         | 21.0 (24.9)      | 7.4 (8.0)        | 12.0 (9.5)       | 13.2 (12.3)      |
| In-hospital Mortality, no. (%)                                                                                                                                                                                                                                                       | 287 (5.8%)       | 129 (9.4%)       | 36 (4.1%)         | 44 (12.7%)       | 16 (2.2%)        | 29 (4.7%)        | 33 (3.2%)        |
| 90-Day Mortality, no. (%)                                                                                                                                                                                                                                                            | 706 (14.2%)      | 278 (20.3%)      | 123 (13.9%)       | 74 (21.3%)       | 67 (9.4%)        | 68 (11.0%)       | 96 (9.3%)        |
| <sup>a</sup> Other race corresponds to Chinese, Filipino, Hawaiian, American Indian/Alaskan, Asian, Hawaiian/Other Pacific Islander, Middle Eastern, Native American, or Pacific Islander                                                                                            |                  |                  |                   |                  |                  |                  |                  |
| <sup>b</sup> SOFA score corresponds to the severity of organ dysfunction, reflecting six organ systems each with a score range of 0 to 4 points (cardiovascular, hepatic, hematologic, respiratory, cranial, renal), with a total score range of 0 to 24 points                      |                  |                  |                   |                  |                  |                  |                  |
| <sup>c</sup> Elixhauser is a method of categorizing comorbidities of patients based on the International Classification of Diseases (ICD) diagnosis codes found in administrative data, ranging from 0 to 31                                                                         |                  |                  |                   |                  |                  |                  |                  |
| <sup>d</sup> Missing data imputed via random forest models ( <b>eTable 3</b> )                                                                                                                                                                                                       |                  |                  |                   |                  |                  |                  |                  |
| <sup>e</sup> Physiologic stress was guided by the Operative Stress Score (Low<1; High 2-5). Procedures without an Operative Stress Score rating were assigned a physiologic stress level based the rating of similar procedures.                                                     |                  |                  |                   |                  |                  |                  |                  |
| <i>Abbreviations:</i> BMI: body mass index; GI: gastrointestinal; HPB: Hepatopancreatobiliary; ICU: intensive care unit; INR: international normalized ratio; IQR: interquartile range; LOS: length of stay; SD: standard deviation; SOFA: sequential organ failure assessment score |                  |                  |                   |                  |                  |                  |                  |

**eTable 6. Logistic Regression - Primary model with all-cause 90-day mortality as outcome**

| Feature <sup>a</sup>                 | aOR  | aOR 95% CI | P-Value |
|--------------------------------------|------|------------|---------|
| <b>Source Control</b>                |      |            |         |
| >6hrs after sepsis onset             | Ref  | -          | -       |
| ≤6hrs of sepsis onset                | 0.71 | 0.63-0.80  | <0.001  |
| Age                                  | 1.03 | 1.02-1.04  | <0.001  |
| <b>Race<sup>b</sup></b>              |      |            |         |
| White                                | Ref  | -          | -       |
| Black                                | 0.79 | 0.66-0.94  | 0.01    |
| Other                                | 1.53 | 1.39-1.69  | <0.001  |
| <b>Sex</b>                           |      |            |         |
| Female                               | Ref  | -          | -       |
| Male                                 | 1.12 | 0.99-1.28  | 0.07    |
| SOFA <sup>c</sup>                    | 1.17 | 1.11-1.24  | <0.001  |
| Elixhauser <sup>d</sup>              | 1.25 | 1.20-1.30  | <0.001  |
| <b>BMI Category</b>                  |      |            |         |
| Normal (18.5 to 25)                  | Ref  | -          | -       |
| Underweight (less than 18.5)         | 1.45 | 1.02-2.07  | 0.039   |
| Overweight (25 to 30)                | 0.68 | 0.57-0.81  | <0.001  |
| Obese (30 or higher)                 | 0.63 | 0.43-0.92  | 0.018   |
| <b>Hospital Transfer</b>             |      |            |         |
| Not transfer                         | Ref  | -          | -       |
| Transfer                             | 1.59 | 1.15-2.20  | 0.05    |
| <b>Surgeon Availability</b>          |      |            |         |
| 24hr on-site                         | Ref  | -          | -       |
| 24hr available                       | 0.95 | 0.68-1.31  | 0.74    |
| Not mandated                         | 0.86 | 0.52-1.44  | 0.57    |
| <b>Anatomic Location</b>             |      |            |         |
| GI and Abdominal                     | Ref  | -          | -       |
| HPB                                  | 0.52 | 0.40-0.67  | <0.001  |
| Thoracic                             | 0.85 | 0.61-1.18  | 0.34    |
| Urologic and Gynecologic             | 0.42 | 0.30-0.59  | <0.001  |
| Orthopedic and Cranial               | 0.56 | 0.42-0.75  | 0.001   |
| Soft tissue                          | 0.52 | 0.34-0.77  | <0.001  |
| <b>Procedural Physiologic Stress</b> |      |            |         |
| Low stress                           | Ref  | -          | -       |
| High stress                          | 0.72 | 0.53-0.98  | 0.037   |

<sup>a</sup>Year of admission included as fixed effect and p>0.05 for all years, not shown

<sup>b</sup>Other race corresponds to Chinese, Filipino, Hawaiian, American Indian/Alaskan, Asian, Hawaiian/Other Pacific Islander, Middle Eastern, Native American, or Pacific Islander

<sup>c</sup>SOFA score corresponds to the severity of organ dysfunction, reflecting six organ systems each with a score range of 0 to 4 points (cardiovascular, hepatic, hematologic, respiratory, cranial, renal), with a total score range of 0 to 24 points

<sup>d</sup>Elixhauser is a method of categorizing comorbidities of patients based on the International Classification of Diseases (ICD) diagnosis codes found in administrative data, ranging from 0 to 31

*Abbreviations:* aOR: adjusted odds ratio; BMI: body mass index; CI: confidence interval; SOFA: sequential organ failure assessment

**eTable 7. Logistic Regression - Primary model with all-cause in-hospital mortality as outcome**

| Feature <sup>a</sup>                 | aOR  | aOR 95% CI  | P-Value |
|--------------------------------------|------|-------------|---------|
| <b>Source Control</b>                |      |             |         |
| >6hrs after sepsis onset             | Ref  | -           | -       |
| ≤6hrs of sepsis onset                | 0.76 | (0.63-0.90) | 0.002   |
| Age                                  | 1.02 | (1.01-1.03) | 0.001   |
| <b>Race<sup>b</sup></b>              |      |             |         |
| White                                | Ref  | -           | -       |
| Black                                | 0.82 | (0.73-0.93) | 0.002   |
| Other                                | 1.72 | (1.38-2.14) | <0.001  |
| <b>Sex</b>                           |      |             |         |
| Female                               | Ref  | -           | -       |
| Male                                 | 1.21 | (1.03-1.41) | 0.018   |
| SOFA <sup>c</sup>                    | 1.18 | (1.14-1.23) | <0.001  |
| Elixhauser <sup>d</sup>              | 1.33 | (1.26-1.40) | <0.001  |
| <b>BMI Category</b>                  |      |             |         |
| Normal (18.5 to 25)                  | Ref  | -           | -       |
| Underweight (less than 18.5)         | 2.01 | (1.37-2.94) | <0.001  |
| Overweight (25 to 30)                | 0.99 | (0.79-1.25) | 0.95    |
| Obese (30 or higher)                 | 1.08 | (0.76-1.53) | 0.68    |
| <b>Hospital Transfer</b>             |      |             |         |
| Not transfer                         | Ref  | -           | -       |
| Transfer                             | 1.92 | (1.52-2.42) | 0       |
| <b>Surgeon Availability</b>          |      |             |         |
| 24hr on-site                         | Ref  | -           | -       |
| 24hr available                       | 1.26 | (0.75-2.13) | 0.38    |
| Not mandated                         | 0.52 | (0.25-1.07) | 0.077   |
| <b>Anatomic Location</b>             |      |             |         |
| GI and Abdominal                     | Ref  | -           | -       |
| HPB                                  | 0.55 | (0.40-0.77) | <0.001  |
| Thoracic                             | 1.50 | (1.11-2.01) | 0.008   |
| Urologic and Gynecologic             | 0.48 | (0.32-0.71) | <0.001  |
| Orthopedic and Cranial               | 0.48 | (0.37-0.62) | <0.001  |
| Soft tissue                          | 0.34 | (0.23-0.49) | <0.001  |
| <b>Procedural Physiologic Stress</b> |      |             |         |
| Low stress                           | Ref  | -           | -       |
| High stress                          | 1.50 | (1.05-2.15) | 0.025   |

<sup>a</sup>Year of admission included as fixed effect and p>0.05 for all years, not shown

<sup>b</sup>Other race corresponds to Chinese, Filipino, Hawaiian, American Indian/Alaskan, Asian, Hawaiian/Other Pacific Islander, Middle Eastern, Native American, or Pacific Islander

<sup>c</sup>SOFA score corresponds to the severity of organ dysfunction, reflecting six organ systems each with a score range of 0 to 4 points (cardiovascular, hepatic, hematologic, respiratory, cranial, renal), with a total score range of 0 to 24 points

<sup>d</sup>Elixhauser is a method of categorizing comorbidities of patients based on the International Classification of Diseases (ICD) diagnosis codes found in administrative data, ranging from 0 to 31

*Abbreviations:* aOR: adjusted odds ratio; BMI: body mass index; CI: confidence interval; SOFA: sequential organ failure assessment



**eTable 8. Logistic Regression - Primary model with all-cause 1-year mortality as outcome**

| Feature <sup>a</sup>                 | aOR  | aOR 95% CI  | P-Value |
|--------------------------------------|------|-------------|---------|
| <b>Source Control</b>                |      |             |         |
| >6hrs after sepsis onset             | Ref  | -           | -       |
| ≤6hrs of sepsis onset                | 0.66 | (0.61-0.71) | <0.001  |
| Age                                  | 1.03 | (1.02-1.04) | <0.001  |
| <b>Race<sup>b</sup></b>              |      |             |         |
| White                                | Ref  | -           | -       |
| Black                                | 0.94 | (0.79-1.12) | 0.48    |
| Other                                | 1.25 | (1.01-1.56) | 0.043   |
| <b>Sex</b>                           |      |             |         |
| Female                               | Ref  | -           | -       |
| Male                                 | 1.17 | (1.05-1.32) | <0.001  |
| SOFA <sup>c</sup>                    | 1.14 | (1.09-1.18) | <0.001  |
| Elixhauser <sup>d</sup>              | 1.27 | (1.21-1.34) | <0.001  |
| <b>BMI Category</b>                  |      |             |         |
| Normal (18.5 to 25)                  | Ref  | -           | -       |
| Underweight (less than 18.5)         | 2.17 | (1.52-3.10) | <0.001  |
| Overweight (25 to 30)                | 0.72 | (0.64-0.81) | <0.001  |
| Obese (30 or higher)                 | 0.58 | (0.41-0.81) | 0.001   |
| <b>Hospital Transfer</b>             |      |             |         |
| Not transfer                         | Ref  | -           | -       |
| Transfer                             | 1.45 | (1.06-1.99) | 0.021   |
| <b>Surgeon Availability</b>          |      |             |         |
| 24hr on-site                         | Ref  | -           | -       |
| 24hr available                       | 1.10 | (0.77-1.57) | 0.59    |
| Not mandated                         | 1.02 | (0.59-1.76) | 0.95    |
| <b>Anatomic Location</b>             |      |             |         |
| GI and Abdominal                     | Ref  | -           | -       |
| HPB                                  | 0.57 | (0.40-0.82) | 0.002   |
| Thoracic                             | 0.84 | (0.55-1.28) | 0.42    |
| Urologic and Gynecologic             | 0.41 | (0.29-0.59) | <0.001  |
| Orthopedic and Cranial               | 0.58 | (0.41-0.83) | 0.003   |
| Soft tissue                          | 0.66 | (0.42-1.03) | 0.069   |
| <b>Procedural Physiologic Stress</b> |      |             |         |
| Low stress                           | Ref  | -           | -       |
| High stress                          | 0.59 | (0.48-0.71) | <0.001  |

<sup>a</sup>Year of admission included as fixed effect and p>0.05 for all years, not shown

<sup>b</sup>Other race corresponds to Chinese, Filipino, Hawaiian, American Indian/Alaskan, Asian, Hawaiian/Other Pacific Islander, Middle Eastern, Native American, or Pacific Islander

<sup>c</sup>SOFA score corresponds to the severity of organ dysfunction, reflecting six organ systems each with a score range of 0 to 4 points (cardiovascular, hepatic, hematologic, respiratory, cranial, renal), with a total score range of 0 to 24 points

<sup>d</sup>Elixhauser is a method of categorizing comorbidities of patients based on the International Classification of Diseases (ICD) diagnosis codes found in administrative data, ranging from 0 to 31

*Abbreviations:* aOR: adjusted odds ratio; BMI: body mass index; CI: confidence interval; SOFA: sequential organ failure assessment

**eTable 9. Cohort characteristics by most common intervention**

| Feature                                            | All undergoing most common interventions | Exploratory laparotomy | Biliary decompression | Urinary decompression | Soft tissue debridement | Incision or percutaneous drainage |
|----------------------------------------------------|------------------------------------------|------------------------|-----------------------|-----------------------|-------------------------|-----------------------------------|
| N                                                  | 3309                                     | 680                    | 535                   | 647                   | 704                     | 743                               |
| <i>Patient Characteristics</i>                     |                                          |                        |                       |                       |                         |                                   |
| Age, years, mean (SD)                              | 63 (15)                                  | 64 (15)                | 68 (15)               | 64 (16)               | 56 (16)                 | 62 (14)                           |
| Sex, male, no. (%)                                 | 1666 (50%)                               | 335 (49%)              | 278 (52%)             | 266 (41%)             | 383 (54%)               | 404 (54%)                         |
| Race, no. (%) <sup>a</sup>                         |                                          |                        |                       |                       |                         |                                   |
| White                                              | 2812 (85%)                               | 570 (84%)              | 456 (85%)             | 587 (91%)             | 579 (82%)               | 620 (83%)                         |
| Black                                              | 280 (8%)                                 | 58 (9%)                | 24 (4%)               | 44 (7%)               | 61 (9%)                 | 93 (13%)                          |
| Other                                              | 217 (7%)                                 | 52 (8%)                | 55 (10%)              | 16 (2%)               | 64 (9%)                 | 30 (4%)                           |
| BMI, mean (SD)                                     | 31.1 (9.8)                               | 29.7 (9.3)             | 28.9 (8.7)            | 32.0 (9.6)            | 34.3 (11.0)             | 30.2 (9.2)                        |
| SOFA, max within 6hrs, mean (SD) <sup>b</sup>      | 3.9 (2.5)                                | 5.0 (3.0)              | 3.8 (2.2)             | 3.4 (1.9)             | 4.1 (2.7)               | 3.4 (2.1)                         |
| Elixhauser, mean (SD) <sup>c</sup>                 | 4.1 (2.3)                                | 4.7 (2.4)              | 3.5 (2.2)             | 3.5 (2.2)             | 4.3 (2.4)               | 4.4 (2.3)                         |
| <i>Selected Vitals and Labs<sup>d</sup></i>        |                                          |                        |                       |                       |                         |                                   |
| Heart rate, beats/minute, mean (SD)                | 98 (21)                                  | 106 (24)               | 93 (20)               | 96 (20)               | 100 (21)                | 94 (19)                           |
| Respiratory rate, breaths/minute, mean (SD)        | 21 (6)                                   | 23 (7)                 | 20 (5)                | 21 (6)                | 20 (5)                  | 20 (5)                            |
| GCS, mean (SD)                                     | 13.7 (2.8)                               | 12.9 (3.6)             | 13.9 (2.5)            | 14.1 (2.1)            | 13.7 (2.8)              | 14.0 (2.3)                        |
| Serum lactate, mmol/L, mean (SD)                   | 2.1 (2.2)                                | 3.1 (3.2)              | 1.9 (1.8)             | 1.9 (1.7)             | 2.0 (2.0)               | 1.9 (1.7)                         |
| INR, mean (SD)                                     | 2.1 (2.2)                                | 3.1 (3.2)              | 1.9 (1.8)             | 1.9 (1.7)             | 2.0 (2.0)               | 1.9 (1.7)                         |
| Creatinine, mg/dL, mean (SD)                       | 1.8 (1.8)                                | 1.9 (1.8)              | 1.5 (1.2)             | 1.9 (2.0)             | 1.7 (1.7)               | 1.9 (1.9)                         |
| Bilirubin, mg/dL, mean (SD)                        | 1.8 (1.8)                                | 1.9 (1.8)              | 1.5 (1.2)             | 1.9 (2.0)             | 1.7 (1.7)               | 1.9 (1.9)                         |
| <i>Hospital and Source Control Characteristics</i> |                                          |                        |                       |                       |                         |                                   |
| Mandated Surgeon Availability, no. (%)             |                                          |                        |                       |                       |                         |                                   |
| In-house 24-hours                                  | 1724 (52.1%)                             | 393 (57.8%)            | 353 (66.0%)           | 158 (24.4%)           | 440 (62.5%)             | 380 (51.1%)                       |
| Available 24-hours                                 | 173 (5.2%)                               | 53 (7.8%)              | 18 (3.4%)             | 51 (7.9%)             | 21 (3.0%)               | 30 (4.0%)                         |
| Not Mandated                                       | 1412 (42.7%)                             | 234 (34.4%)            | 164 (30.7%)           | 438 (67.7%)           | 243 (34.5%)             | 333 (44.8%)                       |
| Transfer Status, no. (%)                           |                                          |                        |                       |                       |                         |                                   |
| Not transfer                                       | 2845 (86.0%)                             | 573 (84.3%)            | 443 (82.8%)           | 605 (93.5%)           | 595 (84.5%)             | 629 (84.7%)                       |
| Transfer                                           | 464 (14.0%)                              | 107 (15.7%)            | 92 (17.2%)            | 42 (6.5%)             | 109 (15.5%)             | 114 (15.3%)                       |

|                                                                                                                                                                                                                                                                                      |                  |                 |                   |                   |                 |                   |
|--------------------------------------------------------------------------------------------------------------------------------------------------------------------------------------------------------------------------------------------------------------------------------------|------------------|-----------------|-------------------|-------------------|-----------------|-------------------|
| Time to Antibiotics, hours, mean (SD)                                                                                                                                                                                                                                                | 1.6 (0.3, 3.8)   | 0.6 (-0.1, 2.9) | 2.5 (0.7, 5.0)    | 1.9 (0.6, 4.6)    | 0.9 (0.1, 2.6)  | 1.8 (0.4, 4.4)    |
| Time to Source Control, hours, mean (SD)                                                                                                                                                                                                                                             | 15.3 (5.6, 21.7) | 6.5 (2.1, 16.4) | 17.7 (13.4, 23.4) | 17.0 (10.1, 22.4) | 9.2 (2.9, 19.9) | 18.1 (12.6, 23.1) |
| Procedural Stress, no. (%)                                                                                                                                                                                                                                                           |                  |                 |                   |                   |                 |                   |
| Less stressful                                                                                                                                                                                                                                                                       | 1713 (52%)       | 13 (2%)         | 531 (99%)         | 640 (99%)         | 36 (5%)         | 493 (66%)         |
| More stressful                                                                                                                                                                                                                                                                       | 1596 (48%)       | 667 (98%)       | 4 (1%)            | 7 (1%)            | 668 (95%)       | 250 (34%)         |
| <b>Hospital Utilization and Outcomes</b>                                                                                                                                                                                                                                             |                  |                 |                   |                   |                 |                   |
| Mechanical Ventilation, any, no. (%)                                                                                                                                                                                                                                                 | 973 (29%)        | 474 (70%)       | 75 (14%)          | 70 (11%)          | 262 (37%)       | 92 (12%)          |
| Vasopressors, any, no. (%)                                                                                                                                                                                                                                                           | 690 (21%)        | 327 (48%)       | 55 (10%)          | 77 (12%)          | 152 (22%)       | 79 (11%)          |
| Admitted to ICU, no. (%)                                                                                                                                                                                                                                                             | 1470 (44%)       | 562 (83%)       | 141 (26%)         | 191 (30%)         | 362 (51%)       | 214 (29%)         |
| Hospital LOS, days, mean (SD)                                                                                                                                                                                                                                                        | 7.9 (8.0)        | 9.8 (8.8)       | 6.2 (5.9)         | 5.1 (5.0)         | 7.9 (8.4)       | 6.6 (6.7)         |
| In-hospital Mortality, no. (%)                                                                                                                                                                                                                                                       | 199 (6.0%)       | 104 (15.3%)     | 25 (4.7%)         | 11 (1.7%)         | 26 (3.7%)       | 33 (4.4%)         |
| 90-Day Mortality, no. (%)                                                                                                                                                                                                                                                            | 516 (15.6%)      | 169 (24.9%)     | 92 (17.2%)        | 53 (8.2%)         | 64 (9.1%)       | 138 (18.6%)       |
| <sup>a</sup> Other race corresponds to Chinese, Filipino, Hawaiian, American Indian/Alaskan, Asian, Hawaiian/Other Pacific Islander, Middle Eastern, Native American, or Pacific Islander                                                                                            |                  |                 |                   |                   |                 |                   |
| <sup>b</sup> SOFA score corresponds to the severity of organ dysfunction, reflecting six organ systems each with a score range of 0 to 4 points (cardiovascular, hepatic, hematologic, respiratory, cranial, renal), with a total score range of 0 to 24 points                      |                  |                 |                   |                   |                 |                   |
| <sup>c</sup> Elixhauser is a method of categorizing comorbidities of patients based on the International Classification of Diseases (ICD) diagnosis codes found in administrative data, ranging from 0 to 31                                                                         |                  |                 |                   |                   |                 |                   |
| <sup>d</sup> Denotes minimum GCS and maximum of all other values prior to sepsis onset                                                                                                                                                                                               |                  |                 |                   |                   |                 |                   |
| <b>Abbreviations:</b> BMI: body mass index; GI: gastrointestinal; HPB: Hepatopancreatobiliary; ICU: intensive care unit; INR: international normalized ratio; IQR: interquartile range; LOS: length of stay; SD: standard deviation; SOFA: sequential organ failure assessment score |                  |                 |                   |                   |                 |                   |

**eTable 10. Adjusted absolute risk difference of 90-day mortality when compared to source control at 6 hours, by most common interventions**

| Most common intervention                                       | No.   | 90-day mortality<br>No. (%) | Adjusted mortality absolute difference from source control at 6 hours |          |          |          |
|----------------------------------------------------------------|-------|-----------------------------|-----------------------------------------------------------------------|----------|----------|----------|
|                                                                |       |                             | 3 hours                                                               | 12 hours | 24 hours | 36 hours |
| All Most common interventions                                  | 3,309 | 516 (16%)                   | -0.38%                                                                | 0.82%    | 2.76%    | 5.12%    |
| Exploratory Laparotomy                                         | 681   | 169 (25%)                   | -1.25%                                                                | 2.63%    | 8.37%    | 14.68%   |
| Biliary Decompression                                          | 539   | 92 (17%)                    | -0.45%                                                                | 0.93%    | 2.92%    | 5.07%    |
| Urinary Decompression                                          | 649   | 53 (8%)                     | -0.45%                                                                | 0.99%    | 3.38%    | 6.42%    |
| Debridement of Skin, Subcutaneous Tissue, Muscle and/or Fascia | 716   | 64 (9%)                     | -0.74%                                                                | 1.70%    | 6.14%    | 12.16%   |
| Incision and Percutaneous Drainage                             | 743   | 138 (19%)                   | 0.34%                                                                 | -0.68%   | -1.98%   | -3.22%   |

**eTable 11. Sensitivity Analyses - Modifications to Covariate Set**

| <b>Sensitivity Analyses – 90-day mortality</b>             |                                                                                                                      | <b>aOR</b> | <b>95% CI</b> | <b>P Value</b> |
|------------------------------------------------------------|----------------------------------------------------------------------------------------------------------------------|------------|---------------|----------------|
| <i>Primary Model – Early Source Control</i>                |                                                                                                                      |            |               |                |
|                                                            | Primary Cohort (N=4,962)                                                                                             | 0.71       | 0.63 - 0.80   | <0.001         |
| <i>Alterative Time to Source Control</i>                   |                                                                                                                      |            |               |                |
|                                                            | Very early (<3 hours; N=811)                                                                                         | 0.68       | 0.58 - 0.81   | <0.001         |
| <i>Expanding Cohort</i>                                    |                                                                                                                      |            |               |                |
|                                                            | Including those who died within 2 days of sepsis onset (N=5,054)                                                     | 0.74       | 0.65 - 0.86   | <0.001         |
| <i>Limiting Cohort</i>                                     |                                                                                                                      |            |               |                |
|                                                            | Excluding hospital transfers (N=4,219)                                                                               | 0.64       | 0.54 - 0.77   | <0.001         |
|                                                            | Excluding pre-procedural SOFA <sup>a</sup> <2 (N=3,123)                                                              | 0.60       | 0.49 - 0.75   | <0.001         |
|                                                            | Excluding time to source control >30 hours (N=4,643)                                                                 | 0.74       | 0.62 - 0.85   | <0.001         |
|                                                            | Excluding time to source control >24 hours (N=4,110)                                                                 | 0.73       | 0.62 - 0.89   | <0.001         |
| <i>Primary Model With Individual Additional Predictors</i> |                                                                                                                      |            |               |                |
| <b>Adding sepsis specific variables</b>                    |                                                                                                                      |            |               |                |
|                                                            | Primary model + time to antibiotics                                                                                  | 0.70       | 0.63 - 0.79   | <0.001         |
|                                                            | Primary model + pre-procedure lactate                                                                                | 0.74       | 0.64 - 0.87   | <0.001         |
| <b>Adding procedure specific variables</b>                 |                                                                                                                      |            |               |                |
|                                                            | Primary model + Operative Stress Score <sup>b</sup>                                                                  | 0.66       | 0.57 - 0.76   | <0.001         |
|                                                            | Primary model + procedure time                                                                                       | 0.67       | 0.59 - 0.76   | <0.001         |
| <b>Adding disease specific variables</b>                   |                                                                                                                      |            |               |                |
|                                                            | Primary model + preprocedural bilirubin, creatinine, INR <sup>c</sup>                                                | 0.75       | 0.66 - 0.86   | <0.001         |
| <i>Primary Model With All Additional Predictors</i>        |                                                                                                                      |            |               |                |
|                                                            | Primary model + time to antibiotics + lactate + Operative Stress Score + procedure time + bilirubin, creatinine, INR | 0.72       | 0.59 - 0.86   | <0.001         |

<sup>a</sup>SOFA score corresponds to the severity of organ dysfunction, reflecting six organ systems each with a score range of 0 to 4 points (cardiovascular, hepatic, hematologic, respiratory, cranial, renal), with a total score range of 0 to 24 points

<sup>b</sup>Operative stress score quantifies physiologic stress for surgical procedures with a score range of 1 to 5 points categorizing procedures as very low stress to very high stress, respectively

<sup>c</sup>Preprocedural creatine [mg/dL] and bilirubin [mg/dL]

*Abbreviations:* aOR: adjusted odds ratio; bilirubin; CI: confidence interval; INR: international normalized ratio; SOFA, sequential organ failure assessment.

**eFigure 1. Cohort accrual**

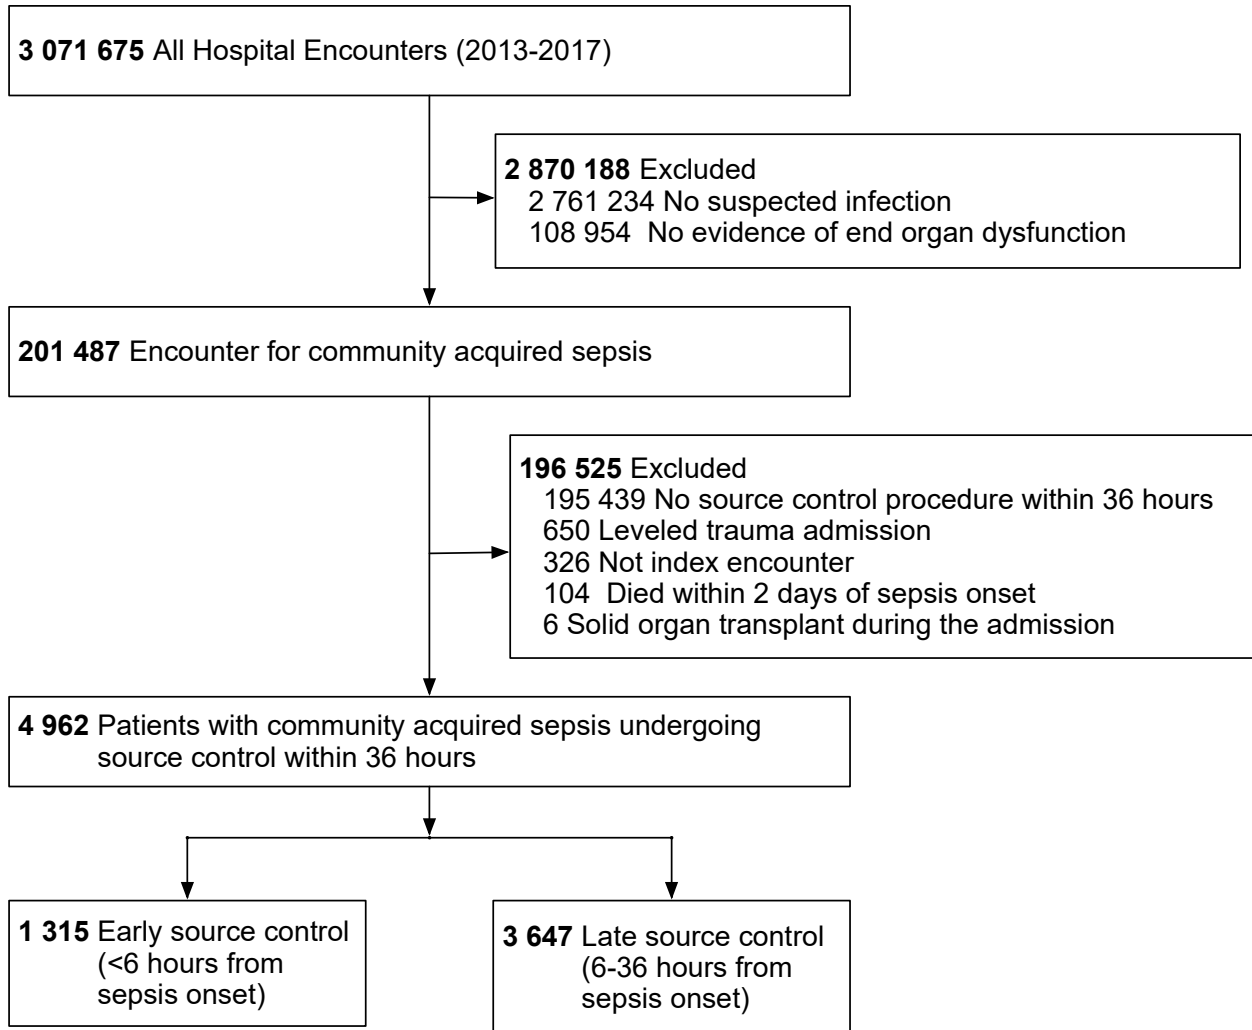

Excluded encounters and patients may have meet more than one exclusion criteria.

**eFigure 2. Correlation between variables and time to source control**

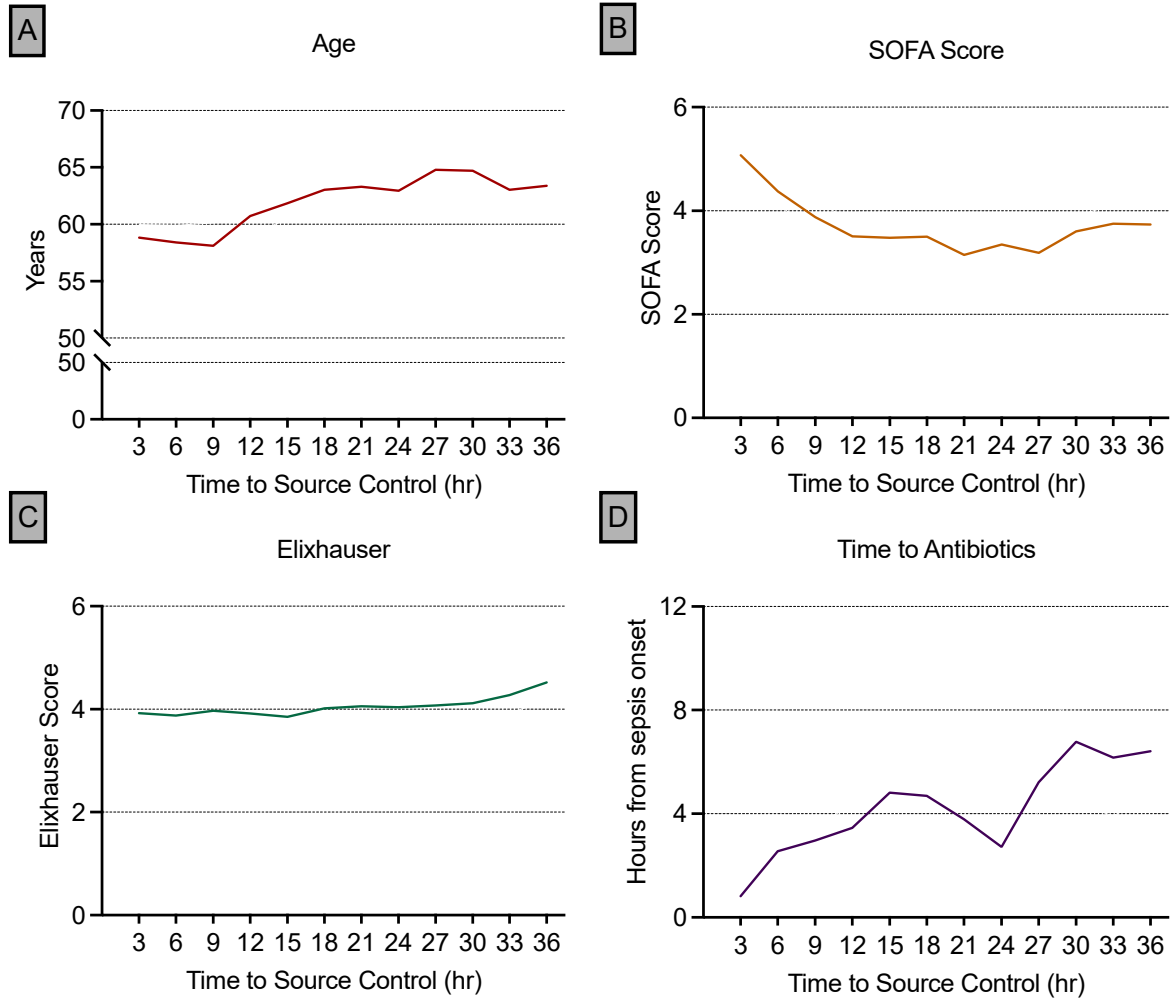

Line graphs demonstrate the variable average overtime with the error bars demonstrating 95% confidence intervals.

*Abbreviations:* SOFA: sequential organ failure assessment score

**eFigure 3. Observed and adjusted risk of 90-day mortality by source control anatomic categories**

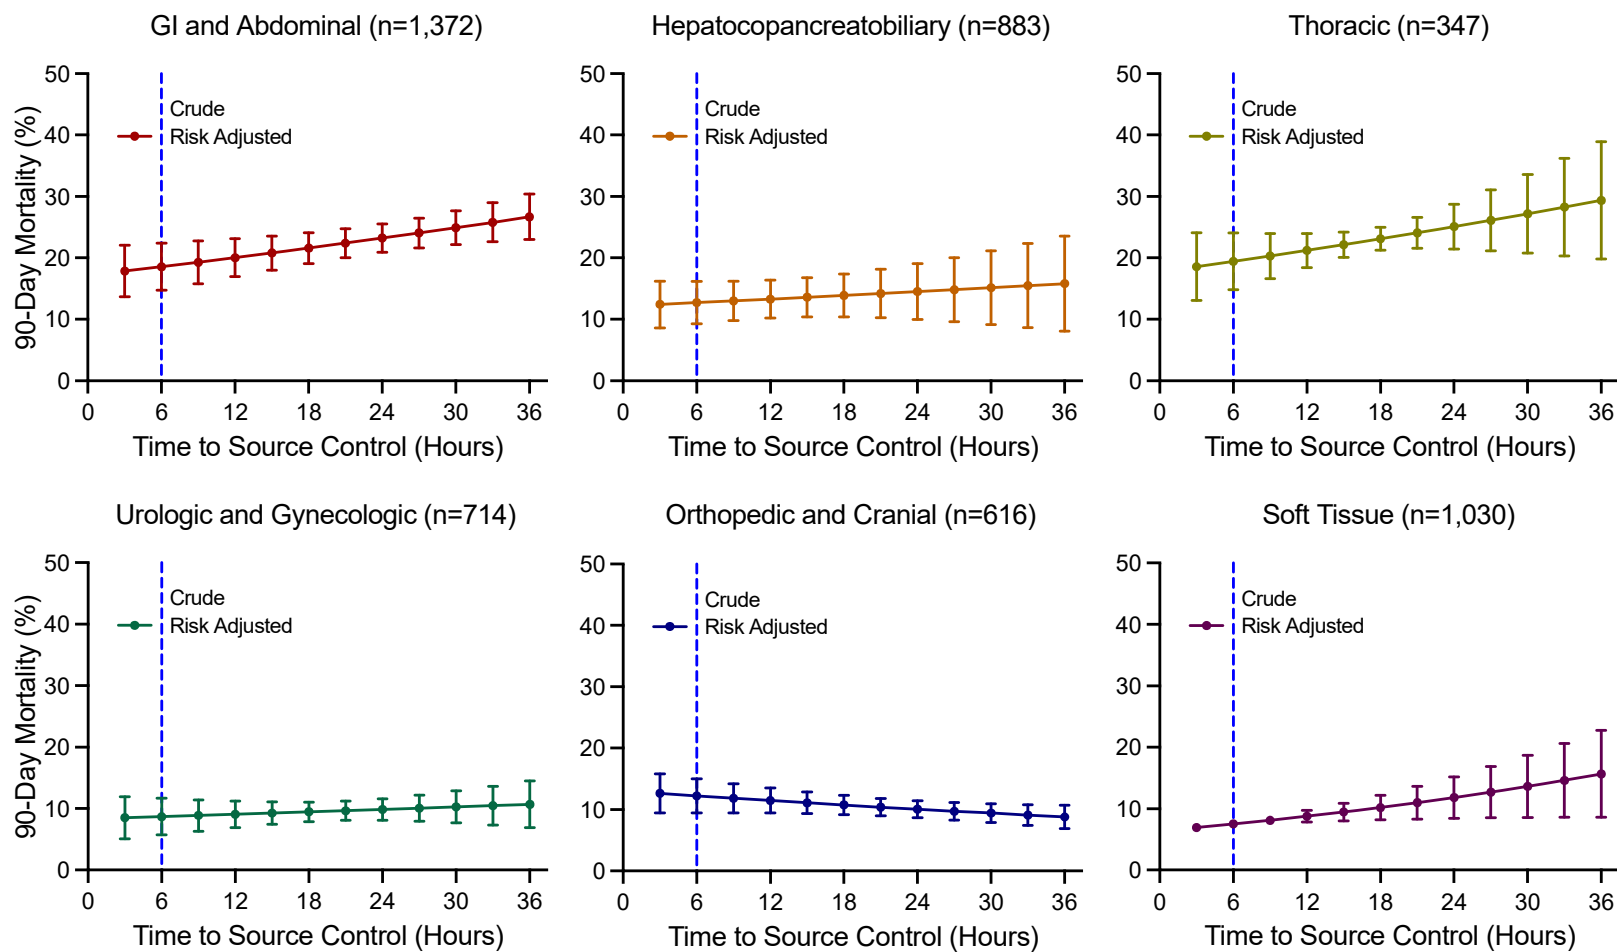

Crude (box) and adjusted (dot) risk of 90-day mortality among each source control anatomic category (Panel B). Error bars correspond to 95% confidence interval of the adjusted risk.

Abbreviations: GI: gastrointestinal



**eFigure 4. Association between early source control and 90-day mortality among the most common interventions**

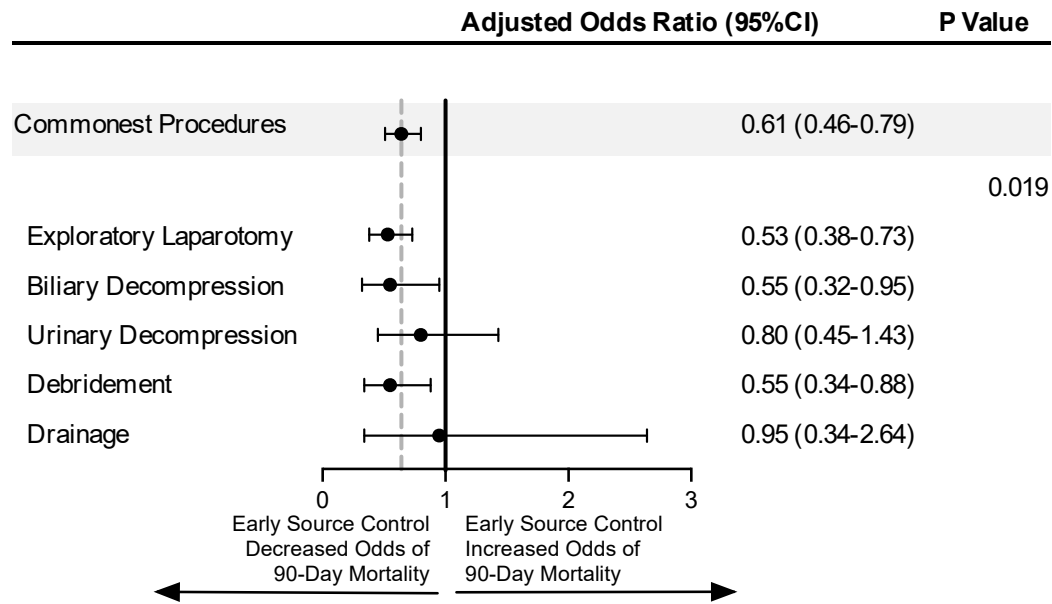

Risk-adjusted odds ratios of 90-day mortality among five most common interventions. No difference in mortality among early or late source control is indicated by a risk-adjusted odds ratio of 1.0, represented by the solid vertical black line. The overall risk-adjusted odds ratio of 90-day mortality associated with early source control is indicated by the vertical dashed gray line. All P values were calculated from the interaction between the treatment group and intervention type. .

*Abbreviations:* aOR: adjusted odds ratio.
